# Supplementary material for: Homochiral three-dimensional noncentrosymmetric lanthanide coordination polymers directed by chiral linkers: syntheses, crystal structures, and optical properties
Source: Royal Society of Chemistry journal article supplement (doi:10.1039/d1ce00281c), 2021-01-01
Supplement: d1ce00281c1.pdf [file d1ce00281c1.pdf]

Electronic Supplementary Information (ESI) for

**Homochiral three-dimensional noncentrosymmetric  
lanthanide coordination polymers directed by chiral  
linkers: syntheses, crystal structures, and optical  
properties**

*Yunseung Kuk and Kang Min Ok\**

Department of Chemistry, Sogang University, Seoul 04107, Republic of Korea

\*E-mail: kmok@sogang.ac.kr

## Contents

| Sections          | Titles                                                                                                                                                                              | Pages   |
|-------------------|-------------------------------------------------------------------------------------------------------------------------------------------------------------------------------------|---------|
| <b>Figure S1.</b> | SEM-EDX data for <b>Ln(R)</b> and <b>Ln(S)</b> (Ln = La, Ce, and Pr).                                                                                                               | S3      |
| <b>Figure S2.</b> | Calculated and experimental powder X-ray diffraction patterns for <b>Ln(R)</b> and <b>Ln(S)</b> (Ln = La, Ce, and Pr).                                                              | S4      |
| <b>Figure S3.</b> | A diagram representing the hydrogen bonding network among the organic ligands (cyan, La; black, C; gray, H; blue, N; red, O; orange, hydrogen bonding).                             | S5      |
| <b>Figure S4.</b> | Thermogravimetric analysis diagrams and PXRD data after calcination for <b>La(R)</b> , <b>Ce(R)</b> , and <b>Pr(R)</b> .                                                            | S6      |
| <b>Figure S5.</b> | Infrared spectra for <b>Ln(R)</b> and <b>Ln(S)</b> (Ln = La, Ce, and Pr).                                                                                                           | S7      |
| <b>Figure S6.</b> | UV-vis spectra for (a and b) <b>Ln(R)</b> and <b>Ln(S)</b> (Ln = La, Ce, and Pr). (Inset) Magnified absorption peaks in the range of 400–650 nm for <b>Pr(R)</b> and <b>Pr(S)</b> . | S8      |
| <b>Figure S7.</b> | Ball-and-stick models of antiparallel environments of <i>TBA</i> <sup>2-</sup> and <i>HTBA</i> <sup>-</sup> ligand (black, C; gray, H; blue, N; red, O).                            | S9      |
| <b>Table S1.</b>  | Bond lengths [Å] and angles [°] for <b>La(R)</b> .                                                                                                                                  | S10–S11 |
| <b>Table S2.</b>  | Bond lengths [Å] and angles [°] for <b>La(S)</b> .                                                                                                                                  | S12–S13 |
| <b>Table S3.</b>  | Bond lengths [Å] and angles [°] for <b>Ce(R)</b> .                                                                                                                                  | S14–S15 |
| <b>Table S4.</b>  | Bond lengths [Å] and angles [°] for <b>Ce(S)</b> .                                                                                                                                  | S16–S17 |
| <b>Table S5.</b>  | Bond lengths [Å] and angles [°] for <b>Pr(R)</b> .                                                                                                                                  | S18–S19 |
| <b>Table S6.</b>  | Bond lengths [Å] and angles [°] for <b>Pr(S)</b> .                                                                                                                                  | S20–S21 |
| <b>Table S7.</b>  | Hydrogen bond distances for <b>La(R)</b> .                                                                                                                                          | S22     |
| <b>Table S8.</b>  | Hydrogen bond distances for <b>La(S)</b> .                                                                                                                                          | S23     |
| <b>Table S9.</b>  | Hydrogen bond distances for <b>Ce(R)</b> .                                                                                                                                          | S24     |
| <b>Table S10.</b> | Hydrogen bond distances for <b>Ce(S)</b> .                                                                                                                                          | S25     |
| <b>Table S11.</b> | Hydrogen bond distances for <b>Pr(R)</b> .                                                                                                                                          | S26     |
| <b>Table S12.</b> | Hydrogen bond distances for <b>Pr(S)</b> .                                                                                                                                          | S27     |
| <b>Table S13.</b> | Bond-valence sum (BVS) calculations for <b>Ln(R)</b> and <b>Ln(S)</b> (Ln = La, Ce, and Pr).                                                                                        | S28     |
| <b>Table S14.</b> | SHG efficiencies of Ln-CPs composed of lanthanide cations and chiral organic ligands.                                                                                               | S29     |
| <b>Reference</b>  |                                                                                                                                                                                     | S30     |

**Figure S1.** SEM-EDX data for Ln(R) and Ln(S) (Ln = La, Ce, and Pr).

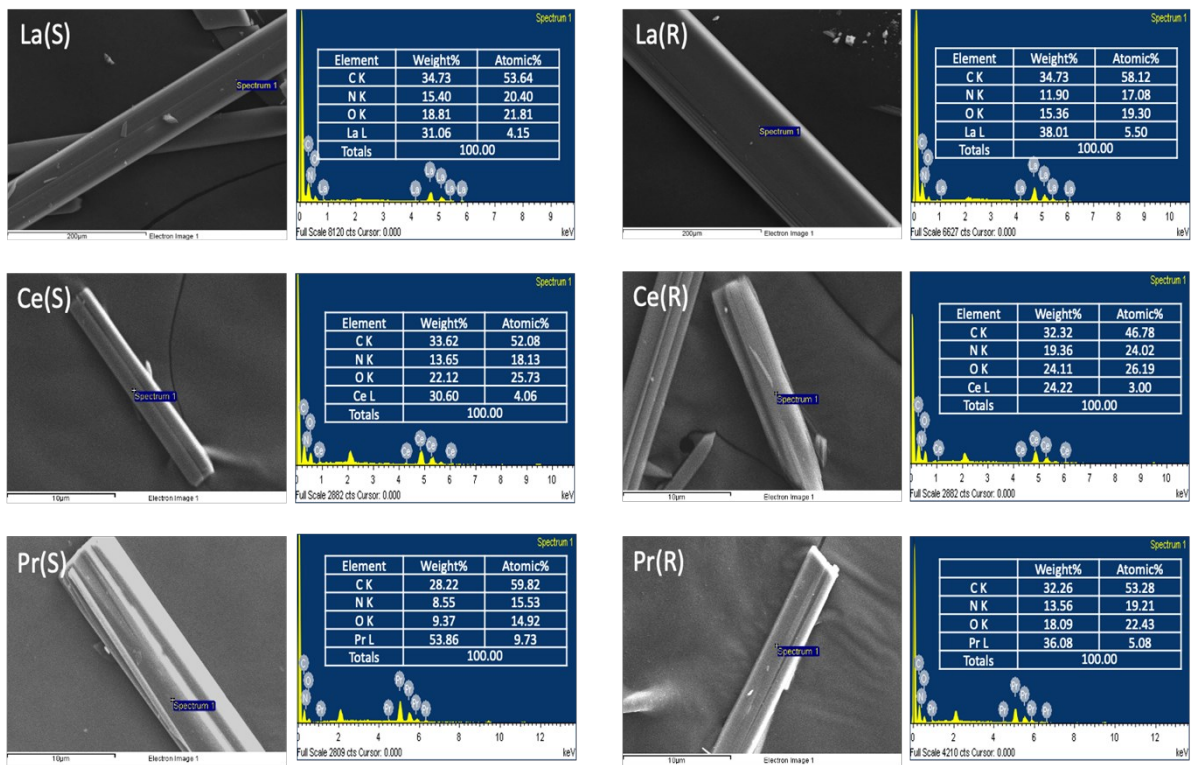

**Figure S2.** Calculated and experimental powder X-ray diffraction patterns for **Ln(R)** and **Ln(S)** (Ln = La, Ce, and Pr).

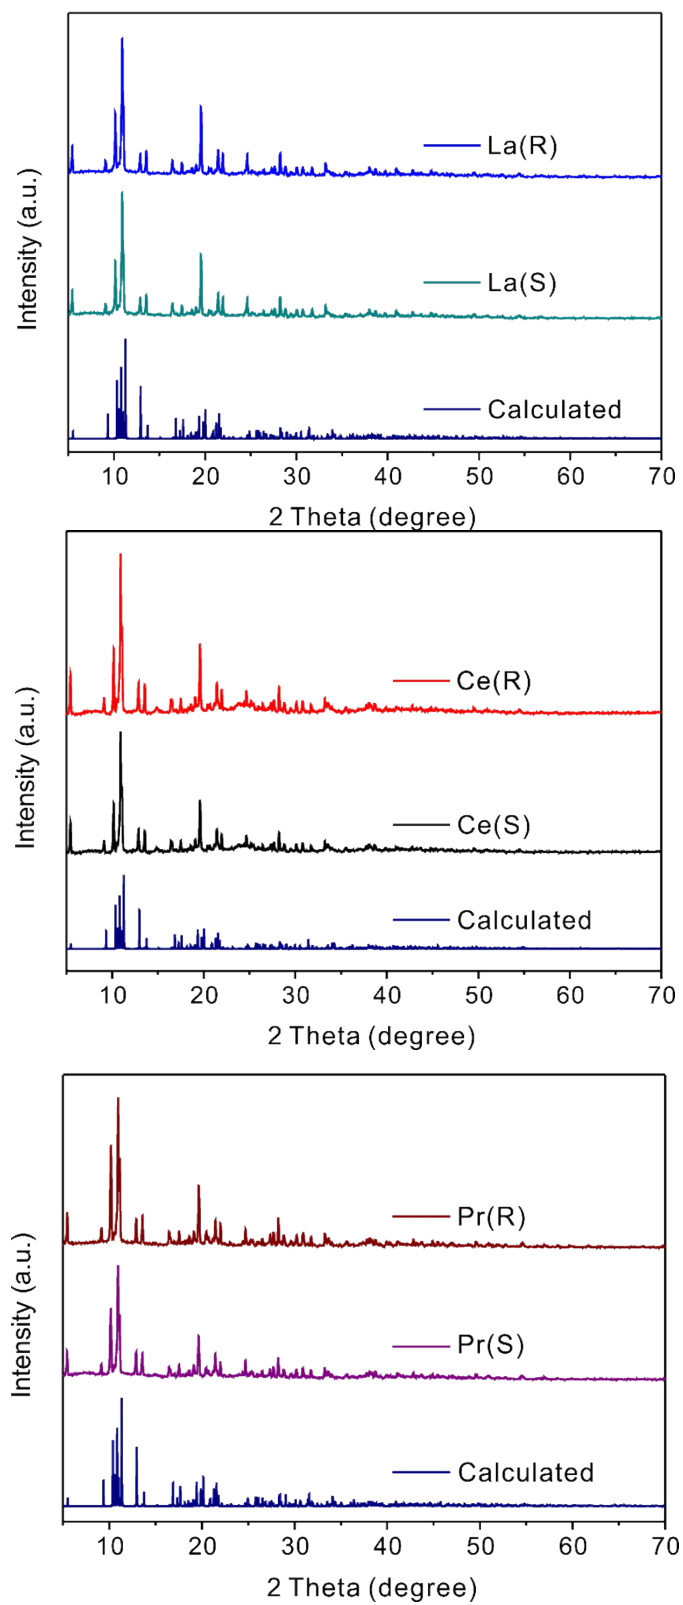

**Figure S3.** A diagram representing the hydrogen bonding network among the organic ligands (cyan, La; black, C; gray, H; blue, N; red, O; orange, hydrogen bonding).

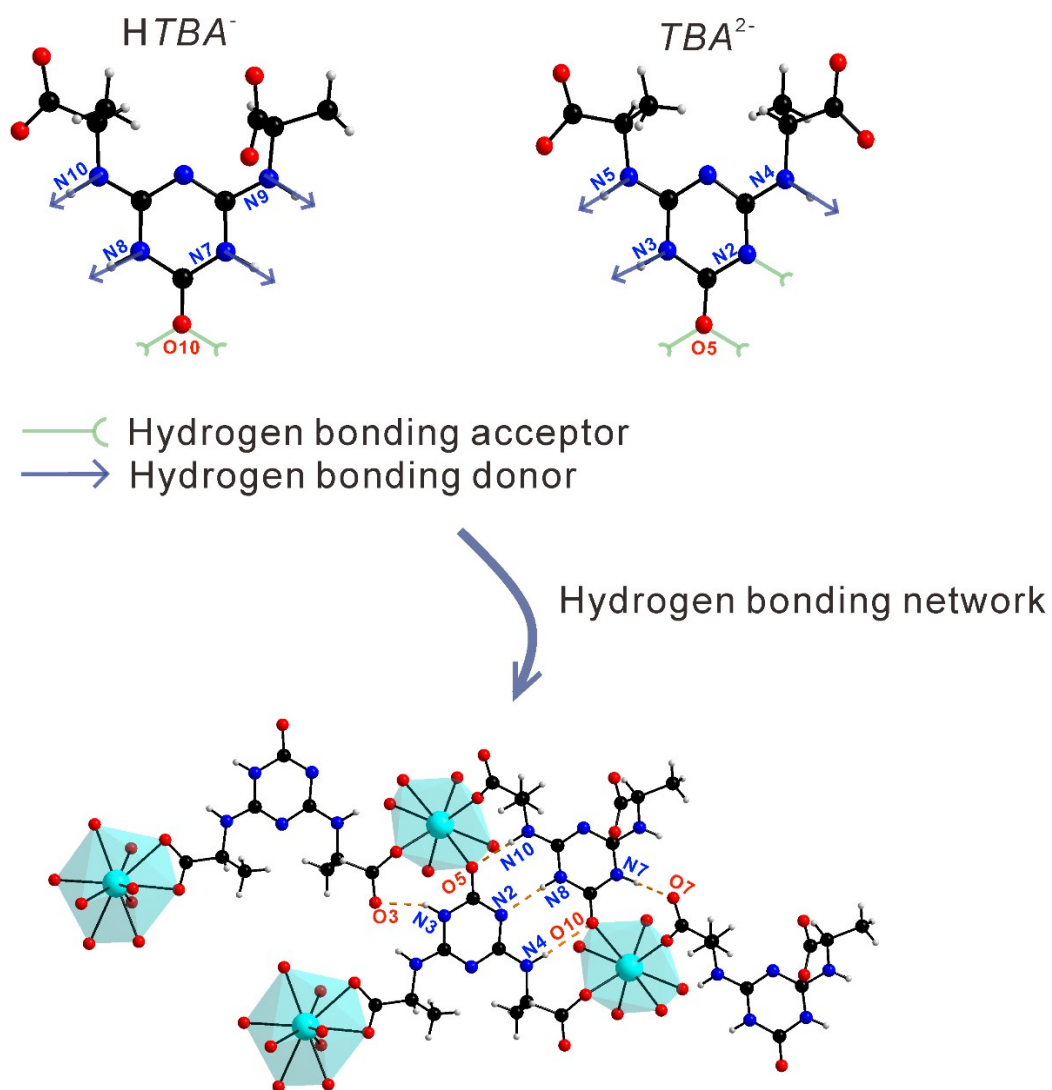

**Figure S4.** Thermogravimetric analysis diagrams and PXRD data after calcination for **La(R)**, **Ce(R)**, and **Pr(R)**.

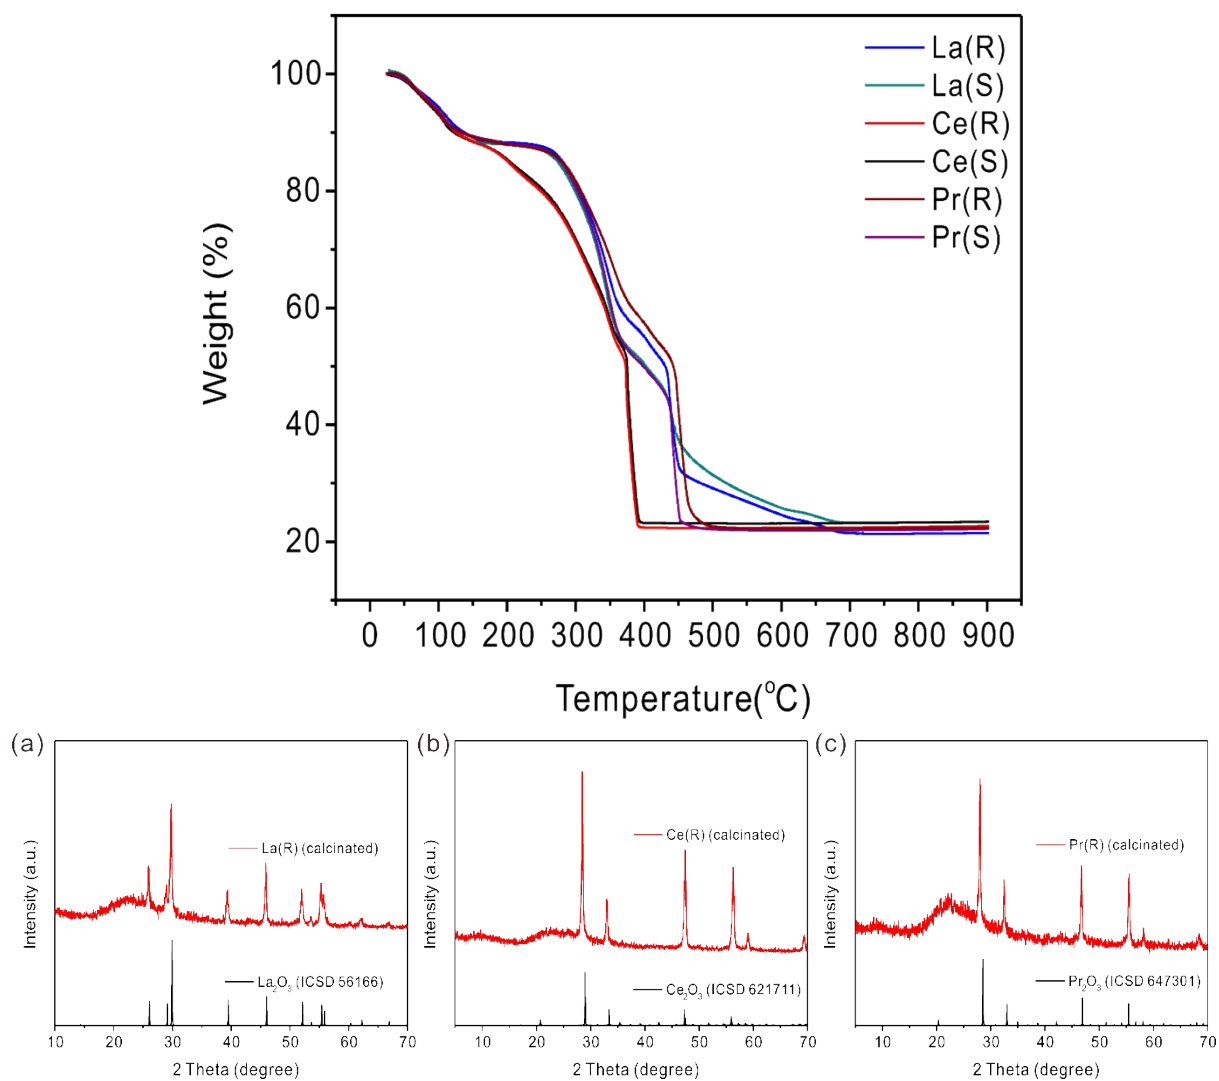

**Figure S5.** Infrared spectra for **Ln(R)** and **Ln(S)** (Ln = La, Ce, and Pr).

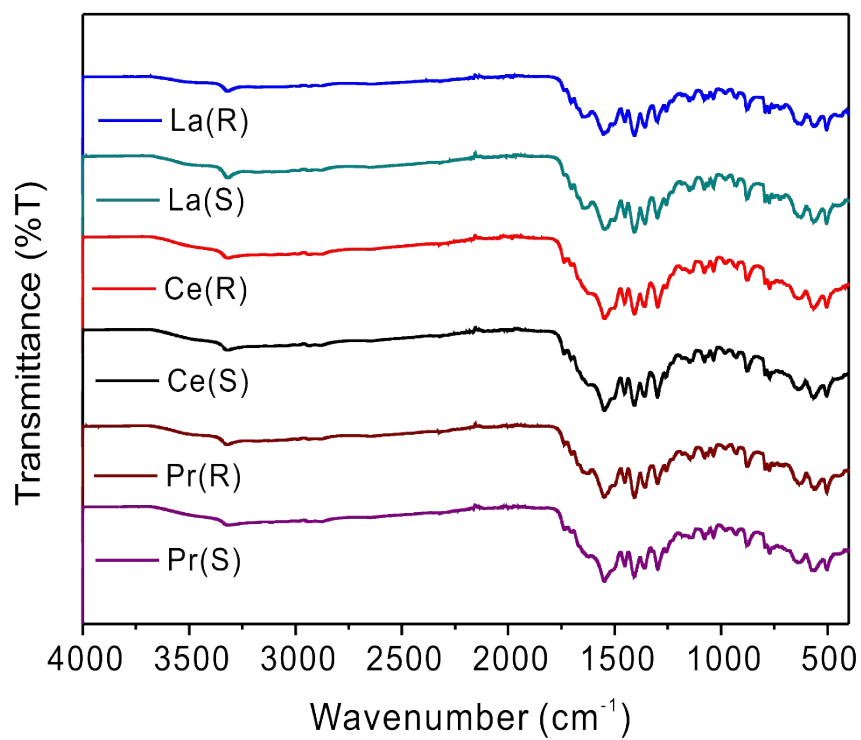

**Figure S6.** UV-vis spectra for (a and b) **Ln(R)** and **Ln(S)** (Ln = La, Ce, and Pr). (Inset) Magnified absorption peaks in the range of 400–650 nm for Pr(R) and Pr(S).

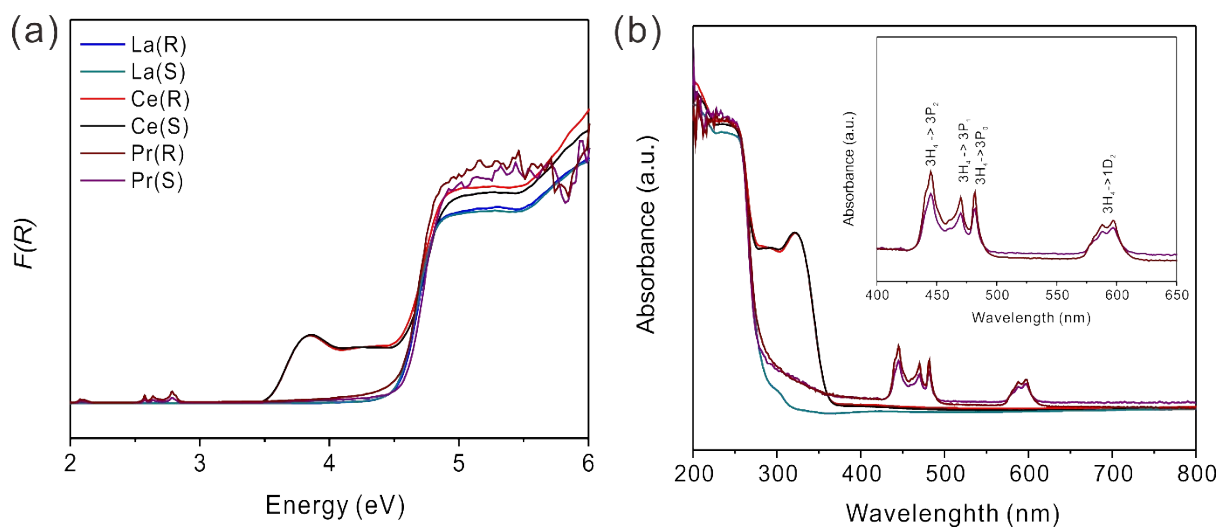



**Figure S7.** Ball-and-stick models of antiparallel environments of  $TBA^{2-}$  and  $HTBA^-$  ligand (black, C; gray, H; blue, N; red, O).

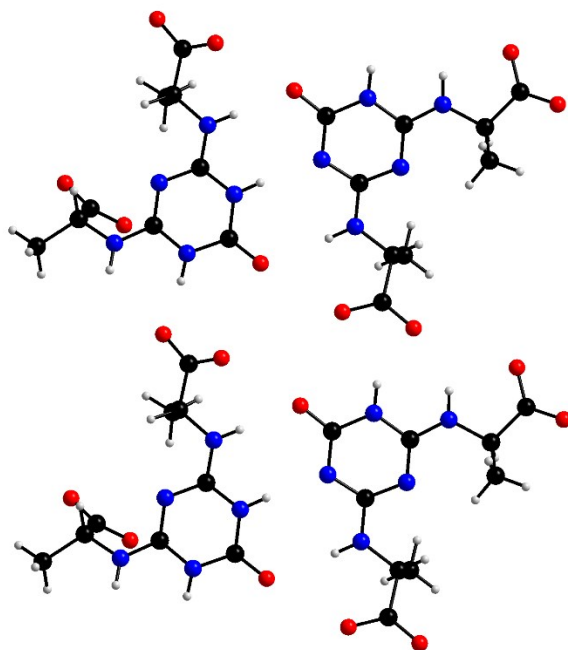

**Table S1.** Bond lengths [ $\text{\AA}$ ] and angles [ $^\circ$ ] for **La(R)**.

| Selected bond distances ( $\text{\AA}$ ) |            |                     |            |
|------------------------------------------|------------|---------------------|------------|
| La(1)-O(6)                               | 2.389(3)   | N(1)-C(3)           | 1.320(7)   |
| La(1)-O(6)#1                             | 2.389(3)   | N(1)-C(2)           | 1.349(6)   |
| La(1)-O(4)                               | 2.415(4)   | N(2)-C(1)           | 1.337(7)   |
| La(1)-O(4)#1                             | 2.415(4)   | N(2)-C(2)           | 1.362(6)   |
| La(1)-O(5)#2                             | 2.583(4)   | N(3)-C(3)           | 1.366(6)   |
| La(1)-O(5)#3                             | 2.583(4)   | N(3)-C(1)           | 1.383(6)   |
| La(1)-O(10)#4                            | 2.624(3)   | N(4)-C(2)           | 1.334(6)   |
| La(1)-O(10)#5                            | 2.624(3)   | N(4)-C(7)           | 1.470(6)   |
| La(2)-O(2)                               | 2.542(4)   | N(5)-C(3)           | 1.328(6)   |
| La(2)-O(2)#6                             | 2.542(4)   | N(5)-C(4)           | 1.461(6)   |
| La(2)-O(11)#6                            | 2.572(4)   | N(6)-C(11)          | 1.323(7)   |
| La(2)-O(11)                              | 2.572(4)   | N(6)-C(12)          | 1.344(6)   |
| La(2)-O(8)#7                             | 2.592(4)   | N(7)-C(10)          | 1.365(6)   |
| La(2)-O(8)#8                             | 2.592(4)   | N(7)-C(11)          | 1.372(6)   |
| La(2)-O(9)#7                             | 2.600(4)   | N(8)-C(10)          | 1.360(6)   |
| La(2)-O(9)#8                             | 2.600(4)   | N(8)-C(12)          | 1.366(6)   |
| La(2)-O(1)#6                             | 2.724(3)   | N(9)-C(11)          | 1.323(6)   |
| La(2)-O(1)                               | 2.724(3)   | N(9)-C(16)          | 1.462(6)   |
| O(1)-C(5)                                | 1.256(7)   | N(10)-C(12)         | 1.320(6)   |
| O(2)-C(5)                                | 1.251(7)   | N(10)-C(13)         | 1.475(6)   |
| O(3)-C(8)                                | 1.247(6)   | C(4)-C(5)           | 1.525(7)   |
| O(4)-C(8)                                | 1.268(6)   | C(4)-C(6)           | 1.544(9)   |
| O(5)-C(1)                                | 1.248(6)   | C(7)-C(8)           | 1.529(7)   |
| O(6)-C(14)                               | 1.276(6)   | C(7)-C(9)           | 1.530(9)   |
| O(7)-C(14)                               | 1.243(7)   | C(13)-C(14)         | 1.510(7)   |
| O(8)-C(17)                               | 1.261(6)   | C(13)-C(15)         | 1.519(9)   |
| O(9)-C(17)                               | 1.252(6)   | C(16)-C(18)         | 1.529(7)   |
| O(10)-C(10)                              | 1.237(6)   | C(16)-C(17)         | 1.540(7)   |
| Selected bond angle ( $^\circ$ )         |            |                     |            |
| O(6)-La(1)-O(6)#1                        | 148.38(18) | O(11)-La(2)-O(1)    | 136.07(12) |
| O(6)-La(1)-O(4)                          | 111.27(13) | O(8)#7-La(2)-O(1)   | 103.19(12) |
| O(6)#1-La(1)-O(4)                        | 77.89(12)  | O(8)#8-La(2)-O(1)   | 69.33(12)  |
| O(6)-La(1)-O(4)#1                        | 77.89(12)  | O(9)#7-La(2)-O(1)   | 70.17(12)  |
| O(6)#1-La(1)-O(4)#1                      | 111.26(13) | O(9)#8-La(2)-O(1)   | 114.74(12) |
| O(4)-La(1)-O(4)#1                        | 147.41(19) | O(1)#6-La(2)-O(1)   | 156.73(17) |
| O(6)-La(1)-O(5)#2                        | 69.05(12)  | C(5)-O(1)-La(2)     | 89.0(3)    |
| O(6)#1-La(1)-O(5)#2                      | 84.46(12)  | C(5)-O(2)-La(2)     | 97.7(3)    |
| O(4)-La(1)-O(5)#2                        | 77.59(12)  | C(8)-O(4)-La(1)     | 146.3(4)   |
| O(4)#1-La(1)-O(5)#2                      | 133.04(12) | C(1)-O(5)-La(1)#4   | 134.2(3)   |
| O(6)-La(1)-O(5)#3                        | 84.46(12)  | C(14)-O(6)-La(1)    | 168.2(4)   |
| O(6)#1-La(1)-O(5)#3                      | 69.05(12)  | C(17)-O(8)-La(2)#9  | 93.0(3)    |
| O(4)-La(1)-O(5)#3                        | 133.04(12) | C(17)-O(9)-La(2)#9  | 92.9(3)    |
| O(4)#1-La(1)-O(5)#3                      | 77.59(12)  | C(10)-O(10)-La(1)#2 | 144.7(3)   |
| O(5)#2-La(1)-O(5)#3                      | 67.11(17)  | C(3)-N(1)-C(2)      | 115.4(4)   |
| O(6)-La(1)-O(10)#4                       | 76.85(12)  | C(1)-N(2)-C(2)      | 116.7(4)   |
| O(6)#1-La(1)-O(10)#4                     | 133.33(12) | C(3)-N(3)-C(1)      | 120.9(4)   |
| O(4)-La(1)-O(10)#4                       | 70.77(12)  | C(2)-N(4)-C(7)      | 122.4(4)   |
| O(4)#1-La(1)-O(10)#4                     | 81.78(13)  | C(3)-N(5)-C(4)      | 124.6(5)   |
| O(5)#2-La(1)-O(10)#4                     | 119.96(12) | C(11)-N(6)-C(12)    | 116.0(4)   |
| O(5)#3-La(1)-O(10)#4                     | 154.63(11) | C(10)-N(7)-C(11)    | 120.7(4)   |

|                       |            |                   |          |
|-----------------------|------------|-------------------|----------|
| O(6)-La(1)-O(10)#5    | 133.33(12) | C(10)-N(8)-C(12)  | 121.2(4) |
| O(6)#1-La(1)-O(10)#5  | 76.85(12)  | C(11)-N(9)-C(16)  | 121.9(4) |
| O(4)-La(1)-O(10)#5    | 81.78(13)  | C(12)-N(10)-C(13) | 121.0(4) |
| O(4)#1-La(1)-O(10)#5  | 70.77(12)  | O(5)-C(1)-N(2)    | 123.1(4) |
| O(5)#2-La(1)-O(10)#5  | 154.63(11) | O(5)-C(1)-N(3)    | 118.1(4) |
| O(5)#3-La(1)-O(10)#5  | 119.96(12) | N(2)-C(1)-N(3)    | 118.7(4) |
| O(10)#4-La(1)-O(10)#5 | 65.34(16)  | N(4)-C(2)-N(1)    | 116.3(4) |
| O(2)-La(2)-O(2)#6     | 63.83(19)  | N(4)-C(2)-N(2)    | 117.1(4) |
| O(2)-La(2)-O(11)#6    | 115.63(13) | N(1)-C(2)-N(2)    | 126.6(4) |
| O(2)#6-La(2)-O(11)#6  | 164.28(14) | N(1)-C(3)-N(5)    | 121.9(5) |
| O(2)-La(2)-O(11)      | 164.28(14) | N(1)-C(3)-N(3)    | 121.5(4) |
| O(2)#6-La(2)-O(11)    | 115.63(13) | N(5)-C(3)-N(3)    | 116.6(5) |
| O(11)#6-La(2)-O(11)   | 69.46(18)  | N(5)-C(4)-C(5)    | 106.5(5) |
| O(2)-La(2)-O(8)#7     | 72.81(14)  | N(5)-C(4)-C(6)    | 112.4(5) |
| O(2)#6-La(2)-O(8)#7   | 76.72(14)  | C(5)-C(4)-C(6)    | 109.1(5) |
| O(11)#6-La(2)-O(8)#7  | 118.69(13) | O(2)-C(5)-O(1)    | 123.1(5) |
| O(11)-La(2)-O(8)#7    | 91.64(13)  | O(2)-C(5)-C(4)    | 116.9(5) |
| O(2)-La(2)-O(8)#8     | 76.72(14)  | O(1)-C(5)-C(4)    | 120.0(5) |
| O(2)#6-La(2)-O(8)#8   | 72.81(14)  | N(4)-C(7)-C(8)    | 109.8(4) |
| O(11)#6-La(2)-O(8)#8  | 91.64(13)  | N(4)-C(7)-C(9)    | 111.1(5) |
| O(11)-La(2)-O(8)#8    | 118.69(13) | C(8)-C(7)-C(9)    | 109.1(5) |
| O(8)#7-La(2)-O(8)#8   | 143.95(19) | O(3)-C(8)-O(4)    | 124.6(5) |
| O(2)-La(2)-O(9)#7     | 78.42(15)  | O(3)-C(8)-C(7)    | 117.7(5) |
| O(2)#6-La(2)-O(9)#7   | 122.31(15) | O(4)-C(8)-C(7)    | 117.6(4) |
| O(11)#6-La(2)-O(9)#7  | 71.16(13)  | O(10)-C(10)-N(8)  | 121.6(4) |
| O(11)-La(2)-O(9)#7    | 89.99(13)  | O(10)-C(10)-N(7)  | 122.7(5) |
| O(8)#7-La(2)-O(9)#7   | 50.33(12)  | N(8)-C(10)-N(7)   | 115.7(4) |
| O(8)#8-La(2)-O(9)#7   | 139.47(11) | N(6)-C(11)-N(9)   | 120.0(4) |
| O(2)-La(2)-O(9)#8     | 122.31(15) | N(6)-C(11)-N(7)   | 123.2(4) |
| O(2)#6-La(2)-O(9)#8   | 78.42(15)  | N(9)-C(11)-N(7)   | 116.8(4) |
| O(11)#6-La(2)-O(9)#8  | 89.98(13)  | N(10)-C(12)-N(6)  | 119.1(4) |
| O(11)-La(2)-O(9)#8    | 71.16(13)  | N(10)-C(12)-N(8)  | 118.2(4) |
| O(8)#7-La(2)-O(9)#8   | 139.47(11) | N(6)-C(12)-N(8)   | 122.7(4) |
| O(8)#8-La(2)-O(9)#8   | 50.33(12)  | N(10)-C(13)-C(14) | 110.2(4) |
| O(9)#7-La(2)-O(9)#8   | 157.3(2)   | N(10)-C(13)-C(15) | 111.1(5) |
| O(2)-La(2)-O(1)#6     | 108.01(12) | C(14)-C(13)-C(15) | 112.6(5) |
| O(2)#6-La(2)-O(1)#6   | 49.34(12)  | O(7)-C(14)-O(6)   | 124.4(5) |
| O(11)#6-La(2)-O(1)#6  | 136.07(12) | O(7)-C(14)-C(13)  | 117.2(4) |
| O(11)-La(2)-O(1)#6    | 67.12(12)  | O(6)-C(14)-C(13)  | 118.4(4) |
| O(8)#7-La(2)-O(1)#6   | 69.33(12)  | N(9)-C(16)-C(18)  | 109.3(5) |
| O(8)#8-La(2)-O(1)#6   | 103.19(12) | N(9)-C(16)-C(17)  | 110.6(4) |
| O(9)#7-La(2)-O(1)#6   | 114.74(12) | C(18)-C(16)-C(17) | 110.5(5) |
| O(9)#8-La(2)-O(1)#6   | 70.17(12)  | O(9)-C(17)-O(8)   | 122.9(5) |
| O(2)-La(2)-O(1)       | 49.34(12)  | O(9)-C(17)-C(16)  | 116.8(4) |
| O(2)#6-La(2)-O(1)     | 108.01(12) | O(8)-C(17)-C(16)  | 120.2(4) |
| O(11)#6-La(2)-O(1)    | 67.12(12)  |                   |          |

Symmetry operation: #1 -x+1,y,-z+1; #2 x,y-1,z; #3 -x+1,y-1,-z+1; #4 x,y+1,z; #5 -x+1,y+1,-z+1; #6 -x, y,-z;  
#7 x-1/2,y+3/2,z-1; #8 -x+1/2,y+3/2,-z+1; #9 x+1/2,y-3/2,z+1

**Table S2.** Bond lengths [Å] and angles [°] for **La(S)**.

| Selected bond distances (Å) |            |                     |            |
|-----------------------------|------------|---------------------|------------|
| La(1)-O(6)                  | 2.390(3)   | N(1)-C(3)           | 1.317(6)   |
| La(1)-O(6)#1                | 2.390(3)   | N(1)-C(2)           | 1.349(6)   |
| La(1)-O(4)                  | 2.418(3)   | N(2)-C(1)           | 1.340(6)   |
| La(1)-O(4)#1                | 2.418(3)   | N(2)-C(2)           | 1.363(6)   |
| La(1)-O(5)#2                | 2.580(3)   | N(3)-C(3)           | 1.370(6)   |
| La(1)-O(5)#3                | 2.580(3)   | N(3)-C(1)           | 1.376(6)   |
| La(1)-O(10)#4               | 2.623(3)   | N(4)-C(2)           | 1.335(6)   |
| La(1)-O(10)#5               | 2.623(3)   | N(4)-C(7)           | 1.461(6)   |
| La(2)-O(2)#6                | 2.541(4)   | N(5)-C(3)           | 1.328(6)   |
| La(2)-O(2)                  | 2.541(4)   | N(5)-C(4)           | 1.460(6)   |
| La(2)-O(11)                 | 2.571(4)   | N(6)-C(11)          | 1.328(6)   |
| La(2)-O(11)#6               | 2.571(4)   | N(6)-C(12)          | 1.340(5)   |
| La(2)-O(8)#7                | 2.593(3)   | N(7)-C(10)          | 1.363(6)   |
| La(2)-O(8)#8                | 2.593(3)   | N(7)-C(11)          | 1.372(6)   |
| La(2)-O(9)#7                | 2.600(4)   | N(8)-C(10)          | 1.362(6)   |
| La(2)-O(9)#8                | 2.600(4)   | N(8)-C(12)          | 1.367(6)   |
| La(2)-O(1)#6                | 2.715(3)   | N(9)-C(11)          | 1.317(6)   |
| La(2)-O(1)                  | 2.715(3)   | N(9)-C(16)          | 1.462(6)   |
| O(1)-C(5)                   | 1.254(7)   | N(10)-C(12)         | 1.319(6)   |
| O(2)-C(5)                   | 1.248(6)   | N(10)-C(13)         | 1.473(6)   |
| O(3)-C(8)                   | 1.244(6)   | C(4)-C(6)           | 1.527(8)   |
| O(4)-C(8)                   | 1.267(6)   | C(4)-C(5)           | 1.527(7)   |
| O(5)-C(1)                   | 1.251(6)   | C(7)-C(9)           | 1.521(9)   |
| O(6)-C(14)                  | 1.274(5)   | C(7)-C(8)           | 1.529(7)   |
| O(7)-C(14)                  | 1.232(6)   | C(13)-C(14)         | 1.515(6)   |
| O(8)-C(17)                  | 1.257(6)   | C(13)-C(15)         | 1.520(8)   |
| O(9)-C(17)                  | 1.256(6)   | C(16)-C(18)         | 1.528(7)   |
| O(10)-C(10)                 | 1.237(6)   | C(16)-C(17)         | 1.534(7)   |
| Selected bond angle (°)     |            |                     |            |
| O(6)-La(1)-O(6)#1           | 148.38(17) | O(11)-La(2)-O(1)    | 136.16(12) |
| O(6)-La(1)-O(4)             | 111.17(12) | O(8)#7-La(2)-O(1)   | 69.46(11)  |
| O(6)#1-La(1)-O(4)           | 77.85(12)  | O(8)#8-La(2)-O(1)   | 103.08(12) |
| O(6)-La(1)-O(4)#1           | 77.84(12)  | O(9)#7-La(2)-O(1)   | 114.86(11) |
| O(6)#1-La(1)-O(4)#1         | 111.17(12) | O(9)#8-La(2)-O(1)   | 70.19(12)  |
| O(4)-La(1)-O(4)#1           | 147.91(18) | O(1)#6-La(2)-O(1)   | 156.51(17) |
| O(6)-La(1)-O(5)#2           | 84.45(12)  | C(5)-O(1)-La(2)     | 89.4(3)    |
| O(6)#1-La(1)-O(5)#2         | 69.04(11)  | C(5)-O(2)-La(2)     | 97.8(3)    |
| O(4)-La(1)-O(5)#2           | 132.79(11) | C(8)-O(4)-La(1)     | 146.5(3)   |
| O(4)#1-La(1)-O(5)#2         | 77.39(12)  | C(1)-O(5)-La(1)#4   | 134.4(3)   |
| O(6)-La(1)-O(5)#3           | 69.05(11)  | C(14)-O(6)-La(1)    | 168.2(3)   |
| O(6)#1-La(1)-O(5)#3         | 84.45(12)  | C(17)-O(8)-La(2)#9  | 93.2(3)    |
| O(4)-La(1)-O(5)#3           | 77.39(12)  | C(17)-O(9)-La(2)#9  | 92.9(3)    |
| O(4)#1-La(1)-O(5)#3         | 132.79(11) | C(10)-O(10)-La(1)#3 | 144.4(3)   |
| O(5)#2-La(1)-O(5)#3         | 67.01(15)  | C(3)-N(1)-C(2)      | 115.3(4)   |
| O(6)-La(1)-O(10)#4          | 76.85(11)  | C(1)-N(2)-C(2)      | 116.5(4)   |
| O(6)#1-La(1)-O(10)#4        | 133.34(11) | C(3)-N(3)-C(1)      | 120.8(4)   |
| O(4)-La(1)-O(10)#4          | 70.96(12)  | C(2)-N(4)-C(7)      | 122.7(4)   |
| O(4)#1-La(1)-O(10)#4        | 82.01(12)  | C(3)-N(5)-C(4)      | 124.1(4)   |
| O(5)#2-La(1)-O(10)#4        | 154.65(10) | C(11)-N(6)-C(12)    | 116.1(4)   |
| O(5)#3-La(1)-O(10)#4        | 120.00(11) | C(10)-N(7)-C(11)    | 120.9(4)   |

|                       |            |                   |          |
|-----------------------|------------|-------------------|----------|
| O(6)-La(1)-O(10)#5    | 133.34(11) | C(10)-N(8)-C(12)  | 120.9(4) |
| O(6)#1-La(1)-O(10)#5  | 76.84(11)  | C(11)-N(9)-C(16)  | 121.9(4) |
| O(4)-La(1)-O(10)#5    | 82.01(12)  | C(12)-N(10)-C(13) | 120.9(4) |
| O(4)#1-La(1)-O(10)#5  | 70.96(11)  | O(5)-C(1)-N(2)    | 122.7(4) |
| O(5)#2-La(1)-O(10)#5  | 120.00(11) | O(5)-C(1)-N(3)    | 118.4(4) |
| O(5)#3-La(1)-O(10)#5  | 154.64(10) | N(2)-C(1)-N(3)    | 118.9(4) |
| O(10)#4-La(1)-O(10)#5 | 65.36(15)  | N(4)-C(2)-N(1)    | 116.1(4) |
| O(2)#6-La(2)-O(2)     | 64.03(19)  | N(4)-C(2)-N(2)    | 117.3(4) |
| O(2)#6-La(2)-O(11)    | 115.62(12) | N(1)-C(2)-N(2)    | 126.6(4) |
| O(2)-La(2)-O(11)      | 164.02(14) | N(1)-C(3)-N(5)    | 122.2(4) |
| O(2)#6-La(2)-O(11)#6  | 164.02(14) | N(1)-C(3)-N(3)    | 121.7(4) |
| O(2)-La(2)-O(11)#6    | 115.62(12) | N(5)-C(3)-N(3)    | 116.1(4) |
| O(11)-La(2)-O(11)#6   | 69.45(17)  | N(5)-C(4)-C(6)    | 113.1(5) |
| O(2)#6-La(2)-O(8)#7   | 72.75(13)  | N(5)-C(4)-C(5)    | 106.3(4) |
| O(2)-La(2)-O(8)#7     | 77.17(14)  | C(6)-C(4)-C(5)    | 109.4(5) |
| O(11)-La(2)-O(8)#7    | 118.52(12) | O(2)-C(5)-O(1)    | 122.7(5) |
| O(11)#6-La(2)-O(8)#7  | 91.45(13)  | O(2)-C(5)-C(4)    | 117.0(5) |
| O(2)#6-La(2)-O(8)#8   | 77.17(14)  | O(1)-C(5)-C(4)    | 120.3(4) |
| O(2)-La(2)-O(8)#8     | 72.75(13)  | N(4)-C(7)-C(9)    | 111.1(5) |
| O(11)-La(2)-O(8)#8    | 91.45(13)  | N(4)-C(7)-C(8)    | 110.1(4) |
| O(11)#6-La(2)-O(8)#8  | 118.52(12) | C(9)-C(7)-C(8)    | 109.2(5) |
| O(8)#7-La(2)-O(8)#8   | 144.38(19) | O(3)-C(8)-O(4)    | 124.9(5) |
| O(2)#6-La(2)-O(9)#7   | 78.39(15)  | O(3)-C(8)-C(7)    | 117.7(4) |
| O(2)-La(2)-O(9)#7     | 122.73(14) | O(4)-C(8)-C(7)    | 117.3(4) |
| O(11)-La(2)-O(9)#7    | 71.03(12)  | O(10)-C(10)-N(8)  | 121.4(4) |
| O(11)#6-La(2)-O(9)#7  | 89.77(13)  | O(10)-C(10)-N(7)  | 122.9(4) |
| O(8)#7-La(2)-O(9)#7   | 50.28(11)  | N(8)-C(10)-N(7)   | 115.7(4) |
| O(8)#8-La(2)-O(9)#7   | 139.60(11) | N(9)-C(11)-N(6)   | 120.0(4) |
| O(2)#6-La(2)-O(9)#8   | 122.73(14) | N(9)-C(11)-N(7)   | 117.2(4) |
| O(2)-La(2)-O(9)#8     | 78.39(15)  | N(6)-C(11)-N(7)   | 122.9(4) |
| O(11)-La(2)-O(9)#8    | 89.77(13)  | N(10)-C(12)-N(6)  | 119.2(4) |
| O(11)#6-La(2)-O(9)#8  | 71.04(12)  | N(10)-C(12)-N(8)  | 117.9(4) |
| O(8)#7-La(2)-O(9)#8   | 139.60(11) | N(6)-C(12)-N(8)   | 122.8(4) |
| O(8)#8-La(2)-O(9)#8   | 50.28(11)  | N(10)-C(13)-C(14) | 110.4(4) |
| O(9)#7-La(2)-O(9)#8   | 156.91(19) | N(10)-C(13)-C(15) | 111.1(4) |
| O(2)#6-La(2)-O(1)#6   | 49.24(12)  | C(14)-C(13)-C(15) | 112.9(5) |
| O(2)-La(2)-O(1)#6     | 107.92(12) | O(7)-C(14)-O(6)   | 124.9(5) |
| O(11)-La(2)-O(1)#6    | 67.25(12)  | O(7)-C(14)-C(13)  | 117.3(4) |
| O(11)#6-La(2)-O(1)#6  | 136.17(12) | O(6)-C(14)-C(13)  | 117.8(4) |
| O(8)#7-La(2)-O(1)#6   | 103.08(12) | N(9)-C(16)-C(18)  | 109.0(4) |
| O(8)#8-La(2)-O(1)#6   | 69.46(11)  | N(9)-C(16)-C(17)  | 110.8(4) |
| O(9)#7-La(2)-O(1)#6   | 70.19(12)  | C(18)-C(16)-C(17) | 110.6(4) |
| O(9)#8-La(2)-O(1)#6   | 114.86(11) | O(9)-C(17)-O(8)   | 122.7(5) |
| O(2)#6-La(2)-O(1)     | 107.92(12) | O(9)-C(17)-C(16)  | 116.7(4) |
| O(2)-La(2)-O(1)       | 49.24(12)  | O(8)-C(17)-C(16)  | 120.6(4) |
| O(11)#6-La(2)-O(1)    | 67.25(12)  |                   |          |

Symmetry operation: #1 -x+1,y,-z+1; #2 -x+1,y+1,-z+1; #3 x,y+1,z; #4 x,y-1,z; #5 -x+1,y-1,-z+1; #6 -x, y,-z;  
#7 -x+1/2,y-3/2,-z+1; #8 x-1/2,y-3/2,z-1; #9 x+1/2,y+3/2,z+1

**Table S3.** Bond lengths [ $\text{\AA}$ ] and angles [ $^\circ$ ] for **Ce(R)**.

| Selected bond distances ( $\text{\AA}$ ) |           |                     |           |
|------------------------------------------|-----------|---------------------|-----------|
| Ce(1)-O(6)                               | 2.357(7)  | N(1)-C(3)           | 1.312(13) |
| Ce(1)-O(6)#1                             | 2.357(7)  | N(1)-C(2)           | 1.346(12) |
| Ce(1)-O(4)                               | 2.372(8)  | N(2)-C(1)           | 1.325(14) |
| Ce(1)-O(4)#1                             | 2.372(8)  | N(2)-C(2)           | 1.365(13) |
| Ce(1)-O(5)#2                             | 2.564(8)  | N(3)-C(3)           | 1.360(13) |
| Ce(1)-O(5)#3                             | 2.564(8)  | N(3)-C(1)           | 1.366(13) |
| Ce(1)-O(10)#4                            | 2.612(7)  | N(4)-C(2)           | 1.322(13) |
| Ce(1)-O(10)#5                            | 2.612(7)  | N(4)-C(7)           | 1.460(13) |
| Ce(2)-O(2)#6                             | 2.500(10) | N(5)-C(3)           | 1.327(13) |
| Ce(2)-O(2)                               | 2.500(10) | N(5)-C(4)           | 1.449(13) |
| Ce(2)-O(11)#6                            | 2.544(8)  | N(6)-C(11)          | 1.326(13) |
| Ce(2)-O(11)                              | 2.544(8)  | N(6)-C(12)          | 1.338(12) |
| Ce(2)-O(9)#7                             | 2.566(8)  | N(7)-C(10)          | 1.344(13) |
| Ce(2)-O(9)#8                             | 2.566(8)  | N(7)-C(11)          | 1.361(13) |
| Ce(2)-O(8)#7                             | 2.576(8)  | N(8)-C(10)          | 1.359(13) |
| Ce(2)-O(8)#8                             | 2.576(8)  | N(8)-C(12)          | 1.371(13) |
| Ce(2)-O(1)#6                             | 2.711(7)  | N(9)-C(11)          | 1.318(13) |
| Ce(2)-O(1)                               | 2.711(8)  | N(9)-C(16)          | 1.454(13) |
| O(1)-C(5)                                | 1.255(14) | N(10)-C(12)         | 1.301(13) |
| O(2)-C(5)                                | 1.241(14) | N(10)-C(13)         | 1.463(13) |
| O(3)-C(8)                                | 1.241(14) | C(4)-C(6)           | 1.51(2)   |
| O(4)-C(8)                                | 1.263(12) | C(4)-C(5)           | 1.536(15) |
| O(5)-C(1)                                | 1.250(13) | C(7)-C(8)           | 1.523(15) |
| O(6)-C(14)                               | 1.289(11) | C(7)-C(9)           | 1.54(2)   |
| O(7)-C(14)                               | 1.231(14) | C(13)-C(15)         | 1.491(19) |
| O(8)-C(17)                               | 1.247(13) | C(13)-C(14)         | 1.511(15) |
| O(9)-C(17)                               | 1.243(13) | C(16)-C(18)         | 1.534(16) |
| O(10)-C(10)                              | 1.239(13) | C(16)-C(17)         | 1.541(16) |
| Selected bond angle ( $^\circ$ )         |           |                     |           |
| O(6)-Ce(1)-O(6)#1                        | 148.5(4)  | O(11)-Ce(2)-O(1)    | 135.3(3)  |
| O(6)-Ce(1)-O(4)                          | 111.4(3)  | O(9)#7-Ce(2)-O(1)   | 70.2(3)   |
| O(6)#1-Ce(1)-O(4)                        | 78.0(3)   | O(9)#8-Ce(2)-O(1)   | 114.8(3)  |
| O(6)-Ce(1)-O(4)#1                        | 78.0(3)   | O(8)#7-Ce(2)-O(1)   | 103.2(3)  |
| O(6)#1-Ce(1)-O(4)#1                      | 111.4(3)  | O(8)#8-Ce(2)-O(1)   | 69.8(3)   |
| O(4)-Ce(1)-O(4)#1                        | 146.4(4)  | O(1)#6-Ce(2)-O(1)   | 158.0(3)  |
| O(6)-Ce(1)-O(5)#2                        | 69.2(2)   | C(5)-O(1)-Ce(2)     | 87.8(6)   |
| O(6)#1-Ce(1)-O(5)#2                      | 84.4(3)   | C(5)-O(2)-Ce(2)     | 98.0(8)   |
| O(4)-Ce(1)-O(5)#2                        | 78.1(3)   | C(8)-O(4)-Ce(1)     | 147.0(8)  |
| O(4)#1-Ce(1)-O(5)#2                      | 133.6(2)  | C(1)-O(5)-Ce(1)#5   | 134.4(7)  |
| O(6)-Ce(1)-O(5)#3                        | 84.4(3)   | C(14)-O(6)-Ce(1)    | 168.8(7)  |
| O(6)#1-Ce(1)-O(5)#3                      | 69.2(2)   | C(17)-O(8)-Ce(2)#9  | 92.5(7)   |
| O(4)-Ce(1)-O(5)#3                        | 133.6(3)  | C(17)-O(9)-Ce(2)#9  | 93.1(7)   |
| O(4)#1-Ce(1)-O(5)#3                      | 78.1(3)   | C(10)-O(10)-Ce(1)#2 | 144.3(7)  |
| O(5)#2-Ce(1)-O(5)#3                      | 67.1(4)   | C(3)-N(1)-C(2)      | 115.6(9)  |
| O(6)-Ce(1)-O(10)#4                       | 133.4(2)  | C(1)-N(2)-C(2)      | 116.4(9)  |
| O(6)#1-Ce(1)-O(10)#4                     | 76.7(2)   | C(3)-N(3)-C(1)      | 120.5(9)  |
| O(4)-Ce(1)-O(10)#4                       | 80.9(3)   | C(2)-N(4)-C(7)      | 122.4(9)  |
| O(4)#1-Ce(1)-O(10)#4                     | 70.8(3)   | C(3)-N(5)-C(4)      | 124.1(10) |
| O(5)#2-Ce(1)-O(10)#4                     | 154.2(2)  | C(11)-N(6)-C(12)    | 116.3(9)  |
| O(5)#3-Ce(1)-O(10)#4                     | 120.3(2)  | C(10)-N(7)-C(11)    | 121.2(9)  |

|                       |          |                   |           |
|-----------------------|----------|-------------------|-----------|
| O(6)-Ce(1)-O(10)#5    | 76.7(2)  | C(10)-N(8)-C(12)  | 121.0(9)  |
| O(6)#1-Ce(1)-O(10)#5  | 133.4(2) | C(11)-N(9)-C(16)  | 122.5(9)  |
| O(4)-Ce(1)-O(10)#5    | 70.8(3)  | C(12)-N(10)-C(13) | 121.6(8)  |
| O(4)#1-Ce(1)-O(10)#5  | 80.9(3)  | O(5)-C(1)-N(2)    | 122.2(10) |
| O(5)#2-Ce(1)-O(10)#5  | 120.3(2) | O(5)-C(1)-N(3)    | 118.1(10) |
| O(5)#3-Ce(1)-O(10)#5  | 154.2(2) | N(2)-C(1)-N(3)    | 119.7(10) |
| O(10)#4-Ce(1)-O(10)#5 | 65.1(3)  | N(4)-C(2)-N(1)    | 117.3(9)  |
| O(2)#6-Ce(2)-O(2)     | 64.1(4)  | N(4)-C(2)-N(2)    | 116.8(9)  |
| O(2)#6-Ce(2)-O(11)#6  | 163.8(3) | N(1)-C(2)-N(2)    | 125.8(9)  |
| O(2)-Ce(2)-O(11)#6    | 115.7(3) | N(1)-C(3)-N(5)    | 121.7(10) |
| O(2)#6-Ce(2)-O(11)    | 115.7(3) | N(1)-C(3)-N(3)    | 121.7(9)  |
| O(2)-Ce(2)-O(11)      | 163.8(3) | N(5)-C(3)-N(3)    | 116.6(10) |
| O(11)#6-Ce(2)-O(11)   | 69.4(4)  | N(5)-C(4)-C(6)    | 113.1(11) |
| O(2)#6-Ce(2)-O(9)#7   | 122.9(3) | N(5)-C(4)-C(5)    | 106.7(9)  |
| O(2)-Ce(2)-O(9)#7     | 79.3(3)  | C(6)-C(4)-C(5)    | 109.4(11) |
| O(11)#6-Ce(2)-O(9)#7  | 71.3(3)  | O(2)-C(5)-O(1)    | 123.6(11) |
| O(11)-Ce(2)-O(9)#7    | 88.5(3)  | O(2)-C(5)-C(4)    | 117.5(11) |
| O(2)#6-Ce(2)-O(9)#8   | 79.3(3)  | O(1)-C(5)-C(4)    | 118.9(10) |
| O(2)-Ce(2)-O(9)#8     | 122.9(3) | N(4)-C(7)-C(8)    | 110.4(9)  |
| O(11)#6-Ce(2)-O(9)#8  | 88.5(3)  | N(4)-C(7)-C(9)    | 111.6(11) |
| O(11)-Ce(2)-O(9)#8    | 71.3(3)  | C(8)-C(7)-C(9)    | 108.8(10) |
| O(9)#7-Ce(2)-O(9)#8   | 155.7(4) | O(3)-C(8)-O(4)    | 124.6(10) |
| O(2)#6-Ce(2)-O(8)#7   | 76.8(3)  | O(3)-C(8)-C(7)    | 118.4(9)  |
| O(2)-Ce(2)-O(8)#7     | 73.1(3)  | O(4)-C(8)-C(7)    | 117.0(9)  |
| O(11)#6-Ce(2)-O(8)#7  | 119.1(3) | O(10)-C(10)-N(7)  | 124.1(10) |
| O(11)-Ce(2)-O(8)#7    | 90.9(3)  | O(10)-C(10)-N(8)  | 119.9(9)  |
| O(9)#7-Ce(2)-O(8)#7   | 50.5(3)  | N(7)-C(10)-N(8)   | 116.0(9)  |
| O(9)#8-Ce(2)-O(8)#7   | 140.0(3) | N(9)-C(11)-N(6)   | 119.6(9)  |
| O(2)#6-Ce(2)-O(8)#8   | 73.1(3)  | N(9)-C(11)-N(7)   | 117.5(9)  |
| O(2)-Ce(2)-O(8)#8     | 76.8(3)  | N(6)-C(11)-N(7)   | 122.9(9)  |
| O(11)#6-Ce(2)-O(8)#8  | 90.9(3)  | N(10)-C(12)-N(6)  | 118.9(9)  |
| O(11)-Ce(2)-O(8)#8    | 119.1(3) | N(10)-C(12)-N(8)  | 119.1(9)  |
| O(9)#7-Ce(2)-O(8)#8   | 140.0(3) | N(6)-C(12)-N(8)   | 122.0(9)  |
| O(9)#8-Ce(2)-O(8)#8   | 50.5(3)  | N(10)-C(13)-C(15) | 111.4(11) |
| O(8)#7-Ce(2)-O(8)#8   | 144.3(4) | N(10)-C(13)-C(14) | 110.5(9)  |
| O(2)#6-Ce(2)-O(1)#6   | 49.7(3)  | C(15)-C(13)-C(14) | 112.7(10) |
| O(2)-Ce(2)-O(1)#6     | 108.8(3) | O(7)-C(14)-O(6)   | 124.9(10) |
| O(11)#6-Ce(2)-O(1)#6  | 135.3(3) | O(7)-C(14)-C(13)  | 117.1(9)  |
| O(11)-Ce(2)-O(1)#6    | 66.6(3)  | O(6)-C(14)-C(13)  | 118.0(9)  |
| O(9)#7-Ce(2)-O(1)#6   | 114.8(3) | N(9)-C(16)-C(18)  | 109.5(10) |
| O(9)#8-Ce(2)-O(1)#6   | 70.2(3)  | N(9)-C(16)-C(17)  | 111.1(9)  |
| O(8)#7-Ce(2)-O(1)#6   | 69.8(3)  | C(18)-C(16)-C(17) | 110.1(10) |
| O(8)#8-Ce(2)-O(1)#6   | 103.2(3) | O(9)-C(17)-O(8)   | 123.3(11) |
| O(2)#6-Ce(2)-O(1)     | 108.8(3) | O(9)-C(17)-C(16)  | 117.4(9)  |
| O(2)-Ce(2)-O(1)       | 49.7(3)  | O(8)-C(17)-C(16)  | 119.3(10) |
| O(11)#6-Ce(2)-O(1)    | 66.6(3)  |                   |           |

Symmetry operation: #1 -x+1, y, -z+1; #2 x, y-1, z; #3 -x+1, y-1, -z+1; #4 -x+1, y+1, -z+1; #5 x, y+1, z; #6 -x, y, -z;  
#7 x-1/2, y+3/2, z-1; #8 -x+1/2, y+3/2, -z+1; #9 x+1/2, y-3/2, z+1

**Table S4.** Bond lengths [Å] and angles [°] for Ce(S).

| Selected bond distances (Å) |           |                     |           |
|-----------------------------|-----------|---------------------|-----------|
| Ce(1)-O(6)                  | 2.369(6)  | N(1)-C(3)           | 1.312(12) |
| Ce(1)-O(6)#1                | 2.369(6)  | N(1)-C(2)           | 1.337(12) |
| Ce(1)-O(4)                  | 2.384(7)  | N(2)-C(1)           | 1.338(13) |
| Ce(1)-O(4)#1                | 2.384(7)  | N(2)-C(2)           | 1.353(12) |
| Ce(1)-O(5)#2                | 2.571(7)  | N(3)-C(3)           | 1.367(13) |
| Ce(1)-O(5)#3                | 2.571(7)  | N(3)-C(1)           | 1.375(12) |
| Ce(1)-O(10)#4               | 2.617(7)  | N(4)-C(2)           | 1.339(12) |
| Ce(1)-O(10)#5               | 2.617(7)  | N(4)-C(7)           | 1.466(13) |
| Ce(2)-O(2)#6                | 2.517(9)  | N(5)-C(3)           | 1.332(13) |
| Ce(2)-O(2)                  | 2.517(9)  | N(5)-C(4)           | 1.470(14) |
| Ce(2)-O(11)                 | 2.553(8)  | N(6)-C(11)          | 1.312(13) |
| Ce(2)-O(11)#6               | 2.553(8)  | N(6)-C(12)          | 1.379(12) |
| Ce(2)-O(9)#7                | 2.571(8)  | N(7)-C(10)          | 1.360(13) |
| Ce(2)-O(9)#8                | 2.571(8)  | N(7)-C(11)          | 1.378(12) |
| Ce(2)-O(8)#7                | 2.574(8)  | N(8)-C(12)          | 1.352(12) |
| Ce(2)-O(8)#8                | 2.574(8)  | N(8)-C(10)          | 1.366(12) |
| Ce(2)-O(1)#6                | 2.698(8)  | N(9)-C(11)          | 1.316(12) |
| Ce(2)-O(1)                  | 2.698(8)  | N(9)-C(16)          | 1.445(13) |
| O(1)-C(5)                   | 1.256(14) | N(10)-C(12)         | 1.311(12) |
| O(2)-C(5)                   | 1.259(13) | N(10)-C(13)         | 1.465(12) |
| O(3)-C(8)                   | 1.251(13) | C(4)-C(5)           | 1.531(15) |
| O(4)-C(8)                   | 1.273(12) | C(4)-C(6)           | 1.538(19) |
| O(5)-C(1)                   | 1.242(12) | C(7)-C(8)           | 1.509(15) |
| O(6)-C(14)                  | 1.264(12) | C(7)-C(9)           | 1.54(2)   |
| O(7)-C(14)                  | 1.238(14) | C(13)-C(15)         | 1.48(2)   |
| O(8)-C(17)                  | 1.278(13) | C(13)-C(14)         | 1.497(14) |
| O(9)-C(17)                  | 1.241(13) | C(16)-C(17)         | 1.513(16) |
| O(10)-C(10)                 | 1.220(12) | C(16)-C(18)         | 1.522(17) |
| Selected bond angle (°)     |           |                     |           |
| O(6)-Ce(1)-O(6)#1           | 149.4(4)  | O(11)#6-Ce(2)-O(1)  | 134.8(3)  |
| O(6)-Ce(1)-O(4)             | 110.8(3)  | O(9)#7-Ce(2)-O(1)   | 115.1(3)  |
| O(6)#1-Ce(1)-O(4)           | 78.1(3)   | O(9)#8-Ce(2)-O(1)   | 70.1(3)   |
| O(6)-Ce(1)-O(4)#1           | 78.1(3)   | O(8)#7-Ce(2)-O(1)   | 70.3(3)   |
| O(6)#1-Ce(1)-O(4)#1         | 110.8(3)  | O(8)#8-Ce(2)-O(1)   | 103.1(3)  |
| O(4)-Ce(1)-O(4)#1           | 147.1(4)  | O(1)#6-Ce(2)-O(1)   | 158.3(4)  |
| O(6)-Ce(1)-O(5)#2           | 69.6(2)   | C(5)-O(1)-Ce(2)     | 89.4(6)   |
| O(6)#1-Ce(1)-O(5)#2         | 84.7(3)   | C(5)-O(2)-Ce(2)     | 97.9(7)   |
| O(4)-Ce(1)-O(5)#2           | 77.6(3)   | C(8)-O(4)-Ce(1)     | 148.2(8)  |
| O(4)#1-Ce(1)-O(5)#2         | 133.4(2)  | C(1)-O(5)-Ce(1)#5   | 134.7(6)  |
| O(6)-Ce(1)-O(5)#3           | 84.7(3)   | C(14)-O(6)-Ce(1)    | 171.2(8)  |
| O(6)#1-Ce(1)-O(5)#3         | 69.6(2)   | C(17)-O(8)-Ce(2)#9  | 93.2(6)   |
| O(4)-Ce(1)-O(5)#3           | 133.4(2)  | C(17)-O(9)-Ce(2)#9  | 94.3(7)   |
| O(4)#1-Ce(1)-O(5)#3         | 77.6(3)   | C(10)-O(10)-Ce(1)#2 | 146.1(7)  |
| O(5)#2-Ce(1)-O(5)#3         | 67.0(3)   | C(3)-N(1)-C(2)      | 115.5(8)  |
| O(6)-Ce(1)-O(10)#4          | 133.1(2)  | C(1)-N(2)-C(2)      | 117.1(8)  |
| O(6)#1-Ce(1)-O(10)#4        | 76.2(2)   | C(3)-N(3)-C(1)      | 120.6(9)  |
| O(4)-Ce(1)-O(10)#4          | 80.9(3)   | C(2)-N(4)-C(7)      | 122.7(9)  |
| O(4)#1-Ce(1)-O(10)#4        | 71.4(3)   | C(3)-N(5)-C(4)      | 123.5(9)  |
| O(5)#2-Ce(1)-O(10)#4        | 153.7(2)  | C(11)-N(6)-C(12)    | 116.5(8)  |
| O(5)#3-Ce(1)-O(10)#4        | 120.9(2)  | C(10)-N(7)-C(11)    | 121.6(8)  |



|                       |          |                   |           |
|-----------------------|----------|-------------------|-----------|
| O(6)-Ce(1)-O(10)#5    | 76.2(2)  | C(12)-N(8)-C(10)  | 122.7(8)  |
| O(6)#1-Ce(1)-O(10)#5  | 133.1(2) | C(11)-N(9)-C(16)  | 121.8(9)  |
| O(4)-Ce(1)-O(10)#5    | 71.4(3)  | C(12)-N(10)-C(13) | 121.7(8)  |
| O(4)#1-Ce(1)-O(10)#5  | 80.9(3)  | O(5)-C(1)-N(2)    | 122.7(8)  |
| O(5)#2-Ce(1)-O(10)#5  | 120.9(2) | O(5)-C(1)-N(3)    | 119.0(9)  |
| O(5)#3-Ce(1)-O(10)#5  | 153.7(2) | N(2)-C(1)-N(3)    | 118.3(8)  |
| O(10)#4-Ce(1)-O(10)#5 | 64.6(3)  | N(1)-C(2)-N(4)    | 116.5(8)  |
| O(2)#6-Ce(2)-O(2)     | 63.9(4)  | N(1)-C(2)-N(2)    | 126.4(8)  |
| O(2)#6-Ce(2)-O(11)    | 163.4(3) | N(4)-C(2)-N(2)    | 117.0(8)  |
| O(2)-Ce(2)-O(11)      | 116.0(3) | N(1)-C(3)-N(5)    | 122.5(9)  |
| O(2)#6-Ce(2)-O(11)#6  | 116.0(3) | N(1)-C(3)-N(3)    | 121.7(9)  |
| O(2)-Ce(2)-O(11)#6    | 163.4(3) | N(5)-C(3)-N(3)    | 115.9(9)  |
| O(11)-Ce(2)-O(11)#6   | 69.2(4)  | N(5)-C(4)-C(5)    | 105.8(9)  |
| O(2)#6-Ce(2)-O(9)#7   | 80.1(4)  | N(5)-C(4)-C(6)    | 112.7(11) |
| O(2)-Ce(2)-O(9)#7     | 123.3(3) | C(5)-C(4)-C(6)    | 110.1(10) |
| O(11)-Ce(2)-O(9)#7    | 87.2(3)  | O(1)-C(5)-O(2)    | 122.1(10) |
| O(11)#6-Ce(2)-O(9)#7  | 71.5(3)  | O(1)-C(5)-C(4)    | 121.3(9)  |
| O(2)#6-Ce(2)-O(9)#8   | 123.3(3) | O(2)-C(5)-C(4)    | 116.6(10) |
| O(2)-Ce(2)-O(9)#8     | 80.1(4)  | N(4)-C(7)-C(8)    | 109.8(9)  |
| O(11)-Ce(2)-O(9)#8    | 71.5(3)  | N(4)-C(7)-C(9)    | 109.8(11) |
| O(11)#6-Ce(2)-O(9)#8  | 87.2(3)  | C(8)-C(7)-C(9)    | 109.1(11) |
| O(9)#7-Ce(2)-O(9)#8   | 154.4(5) | O(3)-C(8)-O(4)    | 123.0(10) |
| O(2)#6-Ce(2)-O(8)#7   | 73.8(3)  | O(3)-C(8)-C(7)    | 118.8(10) |
| O(2)-Ce(2)-O(8)#7     | 77.1(3)  | O(4)-C(8)-C(7)    | 118.2(9)  |
| O(11)-Ce(2)-O(8)#7    | 89.9(3)  | O(10)-C(10)-N(7)  | 123.4(9)  |
| O(11)#6-Ce(2)-O(8)#7  | 119.3(3) | O(10)-C(10)-N(8)  | 121.8(9)  |
| O(9)#7-Ce(2)-O(8)#7   | 50.5(2)  | N(7)-C(10)-N(8)   | 114.8(8)  |
| O(9)#8-Ce(2)-O(8)#7   | 140.2(3) | N(6)-C(11)-N(9)   | 120.2(9)  |
| O(2)#6-Ce(2)-O(8)#8   | 77.1(3)  | N(6)-C(11)-N(7)   | 122.6(8)  |
| O(2)-Ce(2)-O(8)#8     | 73.8(3)  | N(9)-C(11)-N(7)   | 117.2(9)  |
| O(11)-Ce(2)-O(8)#8    | 119.3(3) | N(10)-C(12)-N(8)  | 120.0(9)  |
| O(11)#6-Ce(2)-O(8)#8  | 89.9(3)  | N(10)-C(12)-N(6)  | 118.8(8)  |
| O(9)#7-Ce(2)-O(8)#8   | 140.2(3) | N(8)-C(12)-N(6)   | 121.1(9)  |
| O(9)#8-Ce(2)-O(8)#8   | 50.5(2)  | N(10)-C(13)-C(15) | 111.8(11) |
| O(8)#7-Ce(2)-O(8)#8   | 145.5(4) | N(10)-C(13)-C(14) | 110.6(8)  |
| O(2)#6-Ce(2)-O(1)#6   | 49.8(3)  | C(15)-C(13)-C(14) | 113.5(11) |
| O(2)-Ce(2)-O(1)#6     | 109.0(3) | O(7)-C(14)-O(6)   | 123.4(10) |
| O(11)-Ce(2)-O(1)#6    | 134.8(3) | O(7)-C(14)-C(13)  | 117.6(9)  |
| O(11)#6-Ce(2)-O(1)#6  | 66.8(3)  | O(6)-C(14)-C(13)  | 119.0(9)  |
| O(9)#7-Ce(2)-O(1)#6   | 70.1(3)  | N(9)-C(16)-C(17)  | 112.6(9)  |
| O(9)#8-Ce(2)-O(1)#6   | 115.1(3) | N(9)-C(16)-C(18)  | 110.0(10) |
| O(8)#7-Ce(2)-O(1)#6   | 103.1(3) | C(17)-C(16)-C(18) | 111.0(10) |
| O(8)#8-Ce(2)-O(1)#6   | 70.3(3)  | O(9)-C(17)-O(8)   | 121.0(10) |
| O(2)#6-Ce(2)-O(1)     | 109.0(3) | O(9)-C(17)-C(16)  | 119.4(9)  |
| O(2)-Ce(2)-O(1)       | 49.8(3)  | O(8)-C(17)-C(16)  | 119.7(9)  |
| O(11)-Ce(2)-O(1)      | 66.8(3)  |                   |           |

Symmetry operation: #1 -x+1, y, -z+1; #2 x, y+1, z; #3 -x+1, y+1, -z+1; #4 -x+1, y-1, -z+1; #5 x, y-1, z; #6 -x, y, -z; #7 -x+1/2, y-3/2, -z+1; #8 x-1/2, y-3/2, z-1; #9 x+1/2, y+3/2, z+1

**Table S5.** Bond lengths [ $\text{\AA}$ ] and angles [ $^\circ$ ] for **Pr(R)**.

| Selected bond distances ( $\text{\AA}$ ) |            |                     |            |
|------------------------------------------|------------|---------------------|------------|
| Pr(1)-O(6)                               | 2.346(3)   | N(1)-C(3)           | 1.319(6)   |
| Pr(1)-O(6)#1                             | 2.346(3)   | N(1)-C(2)           | 1.348(6)   |
| Pr(1)-O(4)#1                             | 2.368(3)   | N(2)-C(1)           | 1.338(6)   |
| Pr(1)-O(4)                               | 2.368(3)   | N(2)-C(2)           | 1.358(6)   |
| Pr(1)-O(5)#2                             | 2.542(3)   | N(3)-C(3)           | 1.368(6)   |
| Pr(1)-O(5)#3                             | 2.542(3)   | N(3)-C(1)           | 1.378(6)   |
| Pr(1)-O(10)#4                            | 2.599(3)   | N(4)-C(2)           | 1.332(6)   |
| Pr(1)-O(10)#5                            | 2.599(3)   | N(4)-C(7)           | 1.467(6)   |
| Pr(2)-O(2)#6                             | 2.494(4)   | N(5)-C(3)           | 1.318(6)   |
| Pr(2)-O(2)                               | 2.494(4)   | N(5)-C(4)           | 1.455(6)   |
| Pr(2)-O(11)#6                            | 2.526(4)   | N(6)-C(11)          | 1.326(6)   |
| Pr(2)-O(11)                              | 2.526(4)   | N(6)-C(12)          | 1.338(6)   |
| Pr(2)-O(9)#7                             | 2.550(4)   | N(7)-C(10)          | 1.359(6)   |
| Pr(2)-O(9)#8                             | 2.550(4)   | N(7)-C(11)          | 1.369(6)   |
| Pr(2)-O(8)#7                             | 2.554(4)   | N(8)-C(10)          | 1.358(6)   |
| Pr(2)-O(8)#8                             | 2.554(4)   | N(8)-C(12)          | 1.364(6)   |
| Pr(2)-O(1)                               | 2.706(4)   | N(9)-C(11)          | 1.316(6)   |
| Pr(2)-O(1)#6                             | 2.706(4)   | N(9)-C(16)          | 1.457(6)   |
| O(1)-C(5)                                | 1.257(7)   | N(10)-C(12)         | 1.321(6)   |
| O(2)-C(5)                                | 1.246(7)   | N(10)-C(13)         | 1.469(6)   |
| O(3)-C(8)                                | 1.248(7)   | C(4)-C(5)           | 1.526(7)   |
| O(4)-C(8)                                | 1.264(6)   | C(4)-C(6)           | 1.529(9)   |
| O(5)-C(1)                                | 1.250(6)   | C(7)-C(9)           | 1.522(9)   |
| O(6)-C(14)                               | 1.273(6)   | C(7)-C(8)           | 1.522(7)   |
| O(7)-C(14)                               | 1.231(7)   | C(13)-C(14)         | 1.507(6)   |
| O(8)-C(17)                               | 1.257(6)   | C(13)-C(15)         | 1.512(8)   |
| O(9)-C(17)                               | 1.248(6)   | C(16)-C(18)         | 1.525(7)   |
| O(10)-C(10)                              | 1.237(6)   | C(16)-C(17)         | 1.537(7)   |
| Selected bond angle ( $^\circ$ )         |            |                     |            |
| O(6)-Pr(1)-O(6)#1                        | 148.48(17) | O(11)-Pr(2)-O(1)#6  | 66.45(12)  |
| O(6)-Pr(1)-O(4)#1                        | 78.20(12)  | O(9)#7-Pr(2)-O(1)#6 | 114.91(12) |
| O(6)#1-Pr(1)-O(4)#1                      | 111.16(12) | O(9)#8-Pr(2)-O(1)#6 | 70.13(12)  |
| O(6)-Pr(1)-O(4)                          | 111.16(12) | O(8)#7-Pr(2)-O(1)#6 | 69.37(12)  |
| O(6)#1-Pr(1)-O(4)                        | 78.20(12)  | O(8)#8-Pr(2)-O(1)#6 | 103.69(12) |
| O(4)#1-Pr(1)-O(4)                        | 146.52(18) | O(1)-Pr(2)-O(1)#6   | 158.18(17) |
| O(6)-Pr(1)-O(5)#2                        | 84.33(12)  | C(5)-O(1)-Pr(2)     | 88.0(3)    |
| O(6)#1-Pr(1)-O(5)#2                      | 69.28(11)  | C(5)-O(2)-Pr(2)     | 98.3(3)    |
| O(4)#1-Pr(1)-O(5)#2                      | 77.85(12)  | C(8)-O(4)-Pr(1)     | 146.8(3)   |
| O(4)-Pr(1)-O(5)#2                        | 133.66(12) | C(1)-O(5)-Pr(1)#5   | 135.0(3)   |
| O(6)-Pr(1)-O(5)#3                        | 69.28(12)  | C(14)-O(6)-Pr(1)    | 169.1(3)   |
| O(6)#1-Pr(1)-O(5)#3                      | 84.33(12)  | C(17)-O(8)-Pr(2)#9  | 92.4(3)    |
| O(4)#1-Pr(1)-O(5)#3                      | 133.66(12) | C(17)-O(9)-Pr(2)#9  | 92.8(3)    |
| O(4)-Pr(1)-O(5)#3                        | 77.85(12)  | C(10)-O(10)-Pr(1)#3 | 144.4(3)   |
| O(5)#2-Pr(1)-O(5)#3                      | 67.15(16)  | C(3)-N(1)-C(2)      | 115.3(4)   |
| O(6)-Pr(1)-O(10)#4                       | 133.36(11) | C(1)-N(2)-C(2)      | 116.5(4)   |
| O(6)#1-Pr(1)-O(10)#4                     | 76.77(11)  | C(3)-N(3)-C(1)      | 120.9(4)   |
| O(4)#1-Pr(1)-O(10)#4                     | 70.54(12)  | C(2)-N(4)-C(7)      | 122.3(4)   |
| O(4)-Pr(1)-O(10)#4                       | 81.24(12)  | C(3)-N(5)-C(4)      | 124.6(4)   |
| O(5)#2-Pr(1)-O(10)#4                     | 120.23(11) | C(11)-N(6)-C(12)    | 115.9(4)   |
| O(5)#3-Pr(1)-O(10)#4                     | 154.25(11) | C(10)-N(7)-C(11)    | 121.0(4)   |

|                       |            |                   |          |
|-----------------------|------------|-------------------|----------|
| O(6)-Pr(1)-O(10)#5    | 76.77(11)  | C(10)-N(8)-C(12)  | 120.9(4) |
| O(6)#1-Pr(1)-O(10)#5  | 133.36(11) | C(11)-N(9)-C(16)  | 122.0(4) |
| O(4)#1-Pr(1)-O(10)#5  | 81.24(12)  | C(12)-N(10)-C(13) | 120.9(4) |
| O(4)-Pr(1)-O(10)#5    | 70.54(12)  | O(5)-C(1)-N(2)    | 122.9(4) |
| O(5)#2-Pr(1)-O(10)#5  | 154.25(11) | O(5)-C(1)-N(3)    | 118.2(4) |
| O(5)#3-Pr(1)-O(10)#5  | 120.23(11) | N(2)-C(1)-N(3)    | 118.9(4) |
| O(10)#4-Pr(1)-O(10)#5 | 65.16(15)  | N(4)-C(2)-N(1)    | 116.3(4) |
| O(2)#6-Pr(2)-O(2)     | 64.26(19)  | N(4)-C(2)-N(2)    | 116.8(4) |
| O(2)#6-Pr(2)-O(11)#6  | 163.02(14) | N(1)-C(2)-N(2)    | 126.8(4) |
| O(2)-Pr(2)-O(11)#6    | 115.67(13) | N(5)-C(3)-N(1)    | 122.2(5) |
| O(2)#6-Pr(2)-O(11)    | 115.67(13) | N(5)-C(3)-N(3)    | 116.3(4) |
| O(2)-Pr(2)-O(11)      | 163.02(14) | N(1)-C(3)-N(3)    | 121.4(4) |
| O(11)#6-Pr(2)-O(11)   | 69.75(18)  | N(5)-C(4)-C(5)    | 106.7(4) |
| O(2)#6-Pr(2)-O(9)#7   | 123.42(14) | N(5)-C(4)-C(6)    | 113.1(5) |
| O(2)-Pr(2)-O(9)#7     | 79.23(15)  | C(5)-C(4)-C(6)    | 109.0(5) |
| O(11)#6-Pr(2)-O(9)#7  | 71.52(13)  | O(2)-C(5)-O(1)    | 122.9(5) |
| O(11)-Pr(2)-O(9)#7    | 87.96(13)  | O(2)-C(5)-C(4)    | 117.5(5) |
| O(2)#6-Pr(2)-O(9)#8   | 79.23(15)  | O(1)-C(5)-C(4)    | 119.5(5) |
| O(2)-Pr(2)-O(9)#8     | 123.42(14) | N(4)-C(7)-C(9)    | 111.3(5) |
| O(11)#6-Pr(2)-O(9)#8  | 87.97(13)  | N(4)-C(7)-C(8)    | 109.5(4) |
| O(11)-Pr(2)-O(9)#8    | 71.52(13)  | C(9)-C(7)-C(8)    | 108.7(5) |
| O(9)#7-Pr(2)-O(9)#8   | 155.2(2)   | O(3)-C(8)-O(4)    | 124.2(5) |
| O(2)#6-Pr(2)-O(8)#7   | 76.84(14)  | O(3)-C(8)-C(7)    | 117.8(5) |
| O(2)-Pr(2)-O(8)#7     | 73.17(14)  | O(4)-C(8)-C(7)    | 117.9(5) |
| O(11)#6-Pr(2)-O(8)#7  | 119.92(12) | O(10)-C(10)-N(8)  | 121.1(4) |
| O(11)-Pr(2)-O(8)#7    | 90.12(13)  | O(10)-C(10)-N(7)  | 123.1(4) |
| O(9)#7-Pr(2)-O(8)#7   | 51.07(12)  | N(8)-C(10)-N(7)   | 115.8(4) |
| O(9)#8-Pr(2)-O(8)#7   | 139.43(12) | N(9)-C(11)-N(6)   | 120.0(4) |
| O(2)#6-Pr(2)-O(8)#8   | 73.18(14)  | N(9)-C(11)-N(7)   | 117.2(4) |
| O(2)-Pr(2)-O(8)#8     | 76.84(14)  | N(6)-C(11)-N(7)   | 122.8(4) |
| O(11)#6-Pr(2)-O(8)#8  | 90.12(13)  | N(10)-C(12)-N(6)  | 119.0(4) |
| O(11)-Pr(2)-O(8)#8    | 119.92(12) | N(10)-C(12)-N(8)  | 117.9(4) |
| O(9)#7-Pr(2)-O(8)#8   | 139.43(12) | N(6)-C(12)-N(8)   | 123.0(4) |
| O(9)#8-Pr(2)-O(8)#8   | 51.07(12)  | N(10)-C(13)-C(14) | 110.6(4) |
| O(8)#7-Pr(2)-O(8)#8   | 144.45(19) | N(10)-C(13)-C(15) | 110.9(5) |
| O(2)#6-Pr(2)-O(1)     | 108.93(12) | C(14)-C(13)-C(15) | 112.6(5) |
| O(2)-Pr(2)-O(1)       | 49.84(12)  | O(7)-C(14)-O(6)   | 124.9(5) |
| O(11)#6-Pr(2)-O(1)    | 66.45(12)  | O(7)-C(14)-C(13)  | 117.1(4) |
| O(11)-Pr(2)-O(1)      | 135.24(12) | O(6)-C(14)-C(13)  | 118.0(4) |
| O(9)#7-Pr(2)-O(1)     | 70.13(12)  | N(9)-C(16)-C(18)  | 109.2(4) |
| O(9)#8-Pr(2)-O(1)     | 114.91(12) | N(9)-C(16)-C(17)  | 110.8(4) |
| O(8)#7-Pr(2)-O(1)     | 103.69(12) | C(18)-C(16)-C(17) | 110.3(4) |
| O(8)#8-Pr(2)-O(1)     | 69.37(12)  | O(9)-C(17)-O(8)   | 122.9(5) |
| O(2)#6-Pr(2)-O(1)#6   | 49.84(12)  | O(9)-C(17)-C(16)  | 117.0(4) |
| O(2)-Pr(2)-O(1)#6     | 108.93(12) | O(8)-C(17)-C(16)  | 120.2(4) |
| O(11)#6-Pr(2)-O(1)#6  | 135.24(12) |                   |          |

Symmetry operation: #1 -x+1, y, -z+1; #2 -x+1, y-1, -z+1; #3 x, y-1, z; #4 -x+1, y+1, -z+1; #5 x, y+1, z; #6 -x, y, -z; #7 x-1/2, y+3/2, z-1; #8 -x+1/2, y+3/2, -z+1; #9 x+1/2, y-3/2, z+1

**Table S6.** Bond lengths [Å] and angles [°] for **Pr(S)**.

| Selected bond distances (Å) |            |                     |            |
|-----------------------------|------------|---------------------|------------|
| Pr(1)-O(6)#1                | 2.350(5)   | N(1)-C(3)           | 1.308(9)   |
| Pr(1)-O(6)                  | 2.350(5)   | N(1)-C(2)           | 1.347(9)   |
| Pr(1)-O(4)                  | 2.378(5)   | N(2)-C(1)           | 1.343(9)   |
| Pr(1)-O(4)#1                | 2.378(5)   | N(2)-C(2)           | 1.360(9)   |
| Pr(1)-O(5)#2                | 2.554(5)   | N(3)-C(3)           | 1.367(9)   |
| Pr(1)-O(5)#3                | 2.554(5)   | N(3)-C(1)           | 1.383(9)   |
| Pr(1)-O(10)#4               | 2.602(5)   | N(4)-C(2)           | 1.341(9)   |
| Pr(1)-O(10)#5               | 2.602(5)   | N(4)-C(7)           | 1.467(9)   |
| Pr(2)-O(2)                  | 2.516(6)   | N(5)-C(3)           | 1.328(9)   |
| Pr(2)-O(2)#6                | 2.516(6)   | N(5)-C(4)           | 1.463(10)  |
| Pr(2)-O(11)#6               | 2.529(6)   | N(6)-C(11)          | 1.332(9)   |
| Pr(2)-O(11)                 | 2.529(6)   | N(6)-C(12)          | 1.355(9)   |
| Pr(2)-O(9)#7                | 2.555(6)   | N(7)-C(11)          | 1.367(9)   |
| Pr(2)-O(9)#8                | 2.555(6)   | N(7)-C(10)          | 1.369(9)   |
| Pr(2)-O(8)#7                | 2.561(6)   | N(8)-C(10)          | 1.357(9)   |
| Pr(2)-O(8)#8                | 2.561(6)   | N(8)-C(12)          | 1.363(9)   |
| Pr(2)-O(1)                  | 2.699(5)   | N(9)-C(11)          | 1.323(9)   |
| Pr(2)-O(1)#6                | 2.699(5)   | N(9)-C(16)          | 1.461(9)   |
| O(1)-C(5)                   | 1.261(10)  | N(10)-C(12)         | 1.320(9)   |
| O(2)-C(5)                   | 1.246(10)  | N(10)-C(13)         | 1.480(9)   |
| O(3)-C(8)                   | 1.252(9)   | C(4)-C(5)           | 1.543(11)  |
| O(4)-C(8)                   | 1.256(9)   | C(4)-C(6)           | 1.544(14)  |
| O(5)-C(1)                   | 1.244(9)   | C(7)-C(9)           | 1.521(13)  |
| O(6)-C(14)                  | 1.277(8)   | C(7)-C(8)           | 1.537(11)  |
| O(7)-C(14)                  | 1.225(10)  | C(13)-C(15)         | 1.492(13)  |
| O(8)-C(17)                  | 1.271(9)   | C(13)-C(14)         | 1.502(10)  |
| O(9)-C(17)                  | 1.252(10)  | C(16)-C(17)         | 1.527(10)  |
| O(10)-C(10)                 | 1.237(9)   | C(16)-C(18)         | 1.532(11)  |
| Selected bond angle (°)     |            |                     |            |
| O(6)#1-Pr(1)-O(6)           | 148.5(3)   | O(11)-Pr(2)-O(1)#6  | 134.85(19) |
| O(6)#1-Pr(1)-O(4)           | 78.14(18)  | O(9)#7-Pr(2)-O(1)#6 | 69.93(18)  |
| O(6)-Pr(1)-O(4)             | 111.15(19) | O(9)#8-Pr(2)-O(1)#6 | 115.10(18) |
| O(6)#1-Pr(1)-O(4)#1         | 111.15(19) | O(8)#7-Pr(2)-O(1)#6 | 103.55(18) |
| O(6)-Pr(1)-O(4)#1           | 78.14(18)  | O(8)#8-Pr(2)-O(1)#6 | 69.64(18)  |
| O(4)-Pr(1)-O(4)#1           | 146.7(3)   | O(1)-Pr(2)-O(1)#6   | 158.6(3)   |
| O(6)#1-Pr(1)-O(5)#2         | 84.37(18)  | C(5)-O(1)-Pr(2)     | 88.6(5)    |
| O(6)-Pr(1)-O(5)#2           | 69.29(17)  | C(5)-O(2)-Pr(2)     | 97.6(5)    |
| O(4)-Pr(1)-O(5)#2           | 77.71(18)  | C(8)-O(4)-Pr(1)     | 147.1(5)   |
| O(4)#1-Pr(1)-O(5)#2         | 133.60(18) | C(1)-O(5)-Pr(1)#5   | 135.2(5)   |
| O(6)#1-Pr(1)-O(5)#3         | 69.29(17)  | C(14)-O(6)-Pr(1)    | 169.7(5)   |
| O(6)-Pr(1)-O(5)#3           | 84.37(18)  | C(17)-O(8)-Pr(2)#9  | 92.6(4)    |
| O(4)-Pr(1)-O(5)#3           | 133.61(18) | C(17)-O(9)-Pr(2)#9  | 93.3(5)    |
| O(4)#1-Pr(1)-O(5)#3         | 77.70(18)  | C(10)-O(10)-Pr(1)#2 | 145.5(5)   |
| O(5)#2-Pr(1)-O(5)#3         | 67.3(2)    | C(3)-N(1)-C(2)      | 115.4(6)   |
| O(6)#1-Pr(1)-O(10)#4        | 76.63(18)  | C(1)-N(2)-C(2)      | 116.5(6)   |
| O(6)-Pr(1)-O(10)#4          | 133.54(17) | C(3)-N(3)-C(1)      | 120.6(6)   |
| O(4)-Pr(1)-O(10)#4          | 80.96(19)  | C(2)-N(4)-C(7)      | 122.3(6)   |
| O(4)#1-Pr(1)-O(10)#4        | 71.00(18)  | C(3)-N(5)-C(4)      | 123.5(7)   |
| O(5)#2-Pr(1)-O(10)#4        | 153.89(16) | C(11)-N(6)-C(12)    | 115.4(6)   |
| O(5)#3-Pr(1)-O(10)#4        | 120.39(17) | C(11)-N(7)-C(10)    | 120.7(6)   |

|                       |            |                   |          |
|-----------------------|------------|-------------------|----------|
| O(6)#1-Pr(1)-O(10)#5  | 133.54(17) | C(10)-N(8)-C(12)  | 121.7(6) |
| O(6)-Pr(1)-O(10)#5    | 76.63(18)  | C(11)-N(9)-C(16)  | 122.0(6) |
| O(4)-Pr(1)-O(10)#5    | 71.00(18)  | C(12)-N(10)-C(13) | 121.1(6) |
| O(4)#1-Pr(1)-O(10)#5  | 80.96(19)  | O(5)-C(1)-N(2)    | 123.0(6) |
| O(5)#2-Pr(1)-O(10)#5  | 120.39(17) | O(5)-C(1)-N(3)    | 118.4(6) |
| O(5)#3-Pr(1)-O(10)#5  | 153.89(16) | N(2)-C(1)-N(3)    | 118.6(6) |
| O(10)#4-Pr(1)-O(10)#5 | 65.1(2)    | N(4)-C(2)-N(1)    | 116.5(6) |
| O(2)-Pr(2)-O(2)#6     | 64.8(3)    | N(4)-C(2)-N(2)    | 116.8(6) |
| O(2)-Pr(2)-O(11)#6    | 162.7(2)   | N(1)-C(2)-N(2)    | 126.7(6) |
| O(2)#6-Pr(2)-O(11)#6  | 115.66(19) | N(1)-C(3)-N(5)    | 122.3(7) |
| O(2)-Pr(2)-O(11)      | 115.66(19) | N(1)-C(3)-N(3)    | 122.0(6) |
| O(2)#6-Pr(2)-O(11)    | 162.7(2)   | N(5)-C(3)-N(3)    | 115.6(7) |
| O(11)#6-Pr(2)-O(11)   | 69.5(3)    | N(5)-C(4)-C(5)    | 105.6(7) |
| O(2)-Pr(2)-O(9)#7     | 123.8(2)   | N(5)-C(4)-C(6)    | 112.7(8) |
| O(2)#6-Pr(2)-O(9)#7   | 79.2(2)    | C(5)-C(4)-C(6)    | 108.7(8) |
| O(11)#6-Pr(2)-O(9)#7  | 71.63(19)  | O(2)-C(5)-O(1)    | 122.8(8) |
| O(11)-Pr(2)-O(9)#7    | 87.5(2)    | O(2)-C(5)-C(4)    | 116.7(8) |
| O(2)-Pr(2)-O(9)#8     | 79.2(2)    | O(1)-C(5)-C(4)    | 120.4(7) |
| O(2)#6-Pr(2)-O(9)#8   | 123.8(2)   | N(4)-C(7)-C(9)    | 112.0(8) |
| O(11)#6-Pr(2)-O(9)#8  | 87.5(2)    | N(4)-C(7)-C(8)    | 109.2(6) |
| O(11)-Pr(2)-O(9)#8    | 71.63(19)  | C(9)-C(7)-C(8)    | 109.1(7) |
| O(9)#7-Pr(2)-O(9)#8   | 154.8(3)   | O(3)-C(8)-O(4)    | 124.7(7) |
| O(2)-Pr(2)-O(8)#7     | 77.0(2)    | O(3)-C(8)-C(7)    | 117.3(7) |
| O(2)#6-Pr(2)-O(8)#7   | 73.1(2)    | O(4)-C(8)-C(7)    | 118.0(7) |
| O(11)#6-Pr(2)-O(8)#7  | 120.16(18) | O(10)-C(10)-N(8)  | 122.1(7) |
| O(11)-Pr(2)-O(8)#7    | 90.00(19)  | O(10)-C(10)-N(7)  | 122.3(7) |
| O(9)#7-Pr(2)-O(8)#7   | 51.18(17)  | N(8)-C(10)-N(7)   | 115.6(6) |
| O(9)#8-Pr(2)-O(8)#7   | 139.49(17) | N(9)-C(11)-N(6)   | 119.4(7) |
| O(2)-Pr(2)-O(8)#8     | 73.1(2)    | N(9)-C(11)-N(7)   | 117.0(7) |
| O(2)#6-Pr(2)-O(8)#8   | 77.0(2)    | N(6)-C(11)-N(7)   | 123.6(6) |
| O(11)#6-Pr(2)-O(8)#8  | 90.00(19)  | N(10)-C(12)-N(6)  | 118.7(7) |
| O(11)-Pr(2)-O(8)#8    | 120.16(18) | N(10)-C(12)-N(8)  | 118.8(6) |
| O(9)#7-Pr(2)-O(8)#8   | 139.49(17) | N(6)-C(12)-N(8)   | 122.5(6) |
| O(9)#8-Pr(2)-O(8)#8   | 51.18(17)  | N(10)-C(13)-C(15) | 111.0(7) |
| O(8)#7-Pr(2)-O(8)#8   | 144.4(3)   | N(10)-C(13)-C(14) | 110.4(6) |
| O(2)-Pr(2)-O(1)       | 49.80(18)  | C(15)-C(13)-C(14) | 112.9(7) |
| O(2)#6-Pr(2)-O(1)     | 109.36(19) | O(7)-C(14)-O(6)   | 125.1(7) |
| O(11)#6-Pr(2)-O(1)    | 134.85(19) | O(7)-C(14)-C(13)  | 116.7(7) |
| O(11)-Pr(2)-O(1)      | 66.43(19)  | O(6)-C(14)-C(13)  | 118.2(6) |
| O(9)#7-Pr(2)-O(1)     | 115.10(17) | N(9)-C(16)-C(17)  | 111.3(6) |
| O(9)#8-Pr(2)-O(1)     | 69.93(18)  | N(9)-C(16)-C(18)  | 109.0(7) |
| O(8)#7-Pr(2)-O(1)     | 69.64(18)  | C(17)-C(16)-C(18) | 110.9(7) |
| O(8)#8-Pr(2)-O(1)     | 103.55(18) | O(9)-C(17)-O(8)   | 122.2(7) |
| O(2)-Pr(2)-O(1)#6     | 109.36(19) | O(9)-C(17)-C(16)  | 117.6(7) |
| O(2)#6-Pr(2)-O(1)#6   | 49.80(18)  | O(8)-C(17)-C(16)  | 120.1(7) |
| O(11)#6-Pr(2)-O(1)#6  | 66.43(19)  |                   |          |

Symmetry operation: #1 -x+1, y, -z+1; #2 x, y+1, z; #3 -x+1, y+1, -z+1; #4 -x+1, y-1, -z+1; #5 x, y-1, z; #6 -x, y, -z; #7 -x+1/2, y-3/2, -z+1; #8 x-1/2, y-3/2, z-1; #9 x+1/2, y+3/2, z+1

**Table S7.** Hydrogen bond distances for **La(R)**.

| Hydrogen bond distances (Å) |                         |          |           |
|-----------------------------|-------------------------|----------|-----------|
| Name                        | D–H···A                 | d(H···A) | d(D···A)  |
| <b>La(R)</b>                | O(11)-H(11A)...O(12)#4  | 1.92(3)  | 2.724(7)  |
|                             | O(11)-H(11B)...O(15)#10 | 2.10(4)  | 2.878(6)  |
|                             | O(12)-H(12)...O(13)#11  | 2.05(3)  | 2.823(7)  |
|                             | O(13)-H(13A)...O(8)#5   | 2.18(3)  | 3.060(7)  |
|                             | O(13)-H(13B)...O(2)#12  | 2.13(2)  | 2.933(6)  |
|                             | O(14)-H(14A)...O(3)#13  | 2.59(9)  | 3.407(13) |
|                             | O(14)-H(14B)...O(1)#14  | 2.21(12) | 2.848(9)  |
|                             | O(14)-H(14B)...O(8)#5   | 2.44(7)  | 3.242(13) |
|                             | O(15)-H(15A)...O(1)#2   | 2.52(7)  | 2.948(6)  |
|                             | O(15)-H(15A)...O(9)#15  | 2.08(5)  | 2.809(5)  |
|                             | O(15)-H(15B)...O(3)     | 2.11(3)  | 2.919(6)  |
|                             | N(3)-H(3N)...O(3)#4     | 2.05     | 2.860(6)  |
|                             | N(3)-H(3N)...O(4)#4     | 2.45     | 3.230(6)  |
|                             | N(4)-H(4N)...O(10)#4    | 2.31     | 3.174(5)  |
|                             | N(5)-H(5N)...O(3)#4     | 2.20     | 2.986(6)  |
|                             | N(7)-H(7N)...O(6)#2     | 2.65     | 3.377(6)  |
|                             | N(7)-H(7N)...O(7)#2     | 1.95     | 2.684(6)  |
|                             | N(8)-H(8N)...N(2)#2     | 2.03     | 2.871(5)  |
|                             | N(9)-H(9N)...O(7)#2     | 2.60     | 3.159(7)  |
|                             | N(9)-H(9N)...O(15)#3    | 2.09     | 2.822(6)  |
| N(10)-H(10N)...O(5)#2       | 2.02                    | 2.894(5) |           |

Symmetry operation: #1 -x+1, y, -z+1; #2 x, y-1, z; #3 -x+1, y-1, -z+1; #4 x, y+1, z; #5 -x+1, y+1, -z+1  
#6 -x, y, -z; #7 x-1/2, y+3/2, z-1; #8 -x+1/2, y+3/2, -z+1; #9 x+1/2, y-3/2, z+1; #10 -x, y+1, -z  
#11 x-1/2, y+1/2, z; #12 -x+1/2, y-1/2, -z; #13 x+1/2, y+1/2, z; #14 x+1/2, y-1/2, z; #15 x-1/2, y+1/2, z-1

**Table S8.** Hydrogen bond distances for **La(S)**.

| Hydrogen bond distances (Å) |                         |          |           |
|-----------------------------|-------------------------|----------|-----------|
| Name                        | D–H···A                 | d(H···A) | d(D···A)  |
| <b>La(S)</b>                | O(11)-H(11A)...O(12)#4  | 2.25     | 2.723(7)  |
|                             | O(11)-H(11B)...O(15)#10 | 2.07(4)  | 2.868(6)  |
|                             | O(12)-H(12)...O(13)#11  | 2.05(3)  | 2.827(7)  |
|                             | O(13)-H(13B)...O(2)#12  | 2.14(3)  | 2.927(6)  |
|                             | O(13)-H(13A)...O(8)#5   | 2.18(3)  | 3.066(7)  |
|                             | O(14)-H(14B)...O(1)#13  | 2.36(13) | 2.858(8)  |
|                             | O(14)-H(14A)...O(3)#14  | 2.53(4)  | 3.381(12) |
|                             | O(14)-H(14B)...O(1)#13  | 2.36(13) | 2.858(8)  |
|                             | O(14)-H(14B)...O(8)#5   | 2.37(4)  | 3.227(11) |
|                             | O(15)-H(15A)...O(3)     | 2.07(3)  | 2.920(6)  |
|                             | O(15)-H(15B)...O(9)#15  | 2.19(6)  | 2.810(5)  |
|                             | N(3)-H(3N)...O(3)#4     | 2.05     | 2.865(6)  |
|                             | N(3)-H(3N)...O(4)#4     | 2.44     | 3.221(5)  |
|                             | N(4)-H(4N)...O(10)#4    | 2.30     | 3.173(5)  |
|                             | N(5)-H(5N)...O(3)#4     | 2.20     | 2.986(6)  |
| N(7)-H(7N)...O(6)#3         | 2.65                    | 3.372(5) |           |
| N(7)-H(7N)...O(7)#3         | 1.95                    | 2.682(6) |           |
| N(8)-H(8N)...N(2)#3         | 2.03                    | 2.869(5) |           |
| N(9)-H(9N)...O(7)#3         | 2.60                    | 3.158(6) |           |
| N(9)-H(9N)...O(15)#2        | 2.10                    | 2.832(6) |           |
| N(10)-H(10N)...O(5)#3       | 2.02                    | 2.896(5) |           |

Symmetry operation: #1 -x+1, y, -z+1; #2 -x+1, y+1, -z+1; #3 x, y+1, z; #4 x, y-1, z; #5 -x+1, y-1, -z+1  
#6 -x, y, -z; #7 -x+1/2, y-3/2, -z+1; #8 x-1/2, y-3/2, z-1; #9 x+1/2, y+3/2, z+1; #10 -x, y-1, -z;  
#11 x-1/2, y-1/2, z; #12 -x+1/2, y+1/2, -z; #13 x+1/2, y+1/2, z; #14 x+1/2, y-1/2, z; #15 x-1/2, y-1/2, z-1

**Table S9.** Hydrogen bond distances for **Ce(R)**.

| Hydrogen bond distances (Å) |                         |          |           |
|-----------------------------|-------------------------|----------|-----------|
| Name                        | D–H···A                 | d(H···A) | d(D···A)  |
| <b>Ce(R)</b>                | O(11)-H(11B)...O(15)#10 | 2.06(5)  | 2.877(13) |
|                             | O(12)-H(12)...O(11)#2   | 2.32(6)  | 2.744(14) |
|                             | O(13)-H(13A)...O(8)#4   | 2.12(3)  | 3.021(14) |
|                             | O(13)-H(13B)...O(2)#11  | 2.11(3)  | 2.935(14) |
|                             | O(13)-H(13B)...O(12)#12 | 2.27(7)  | 2.814(14) |
|                             | O(14)-H(14A)...N(5)#12  | 2.56(10) | 3.38(2)   |
|                             | O(14)-H(14B)...O(1)#12  | 2.22(11) | 2.830(18) |
|                             | O(14)-H(14B)...O(8)#4   | 2.38(5)  | 3.22(2)   |
|                             | O(15)-H(15A)...O(9)#13  | 2.19(12) | 2.806(12) |
|                             | O(15)-H(15B)...O(3)     | 2.11(7)  | 2.919(13) |
|                             | N(3)-H(3N)...O(3)#5     | 2.01     | 2.824(12) |
|                             | N(3)-H(3N)...O(4)#5     | 2.45     | 3.227(12) |
|                             | N(4)-H(4N)...O(10)#5    | 2.30     | 3.162(12) |
|                             | N(5)-H(5N)...O(3)#5     | 2.19     | 2.975(12) |
|                             | N(7)-H(7N)...O(7)#2     | 1.94     | 2.674(13) |
|                             | N(8)-H(8N)...N(2)#2     | 2.02     | 2.869(12) |
|                             | N(9)-H(9N)...O(7)#2     | 2.59     | 3.154(14) |
|                             | N(9)-H(9N)...O(15)#3    | 2.10     | 2.834(14) |
|                             | N(10)-H(10N)...O(5)#2   | 2.02     | 2.901(11) |

Symmetry operation: #1 -x+1, y, -z+1; #2 x, y-1, z; #3 -x+1, y-1, -z+1; #4 -x+1, y+1, -z+1; #5 x, y+1, z  
#6 -x, y, -z; #7 x-1/2, y+3/2, z-1; #8 -x+1/2, y+3/2, -z+1; #9 x+1/2, y-3/2, z+1; #10 -x, y+1, -z  
#11 -x+1/2, y-1/2, -z; #12 x+1/2, y-1/2, z; #13 x-1/2, y+1/2, z-1



**Table S10.** Hydrogen bond distances for **Ce(S)**.

| Hydrogen bond distances (Å) |                         |           |           |
|-----------------------------|-------------------------|-----------|-----------|
| Name                        | D–H···A                 | d(H···A)  | d(D···A)  |
| <b>Ce(S)</b>                | O(11)-H(11A)...O(12)#5  | 2.28      | 2.733(11) |
|                             | O(11)-H(11B)...O(15)#10 | 2.18(7)   | 2.895(9)  |
|                             | O(12)-H(12)...O(13)#11  | 2.007(17) | 2.828(10) |
|                             | O(13)-H(13A)...O(8)#4   | 2.235(11) | 3.070(9)  |
|                             | O(13)-H(13B)...O(2)#12  | 2.108(18) | 2.930(9)  |
|                             | O(14)-H(14A)...O(1)#13  | 2.03(3)   | 2.845(12) |
|                             | O(14)-H(14B)...O(8)#4   | 2.54(7)   | 3.221(14) |
|                             | O(15)-H(15A)...O(3)     | 2.01(4)   | 2.916(10) |
|                             | O(15)-H(15B)...O(9)#14  | 2.09(3)   | 2.820(8)  |
|                             | N(3)-H(3N)...O(3)#5     | 2.03      | 2.848(9)  |
|                             | N(3)-H(3N)...O(4)#5     | 2.46      | 3.229(8)  |
|                             | N(4)-H(4N)...O(10)#5    | 2.30      | 3.172(8)  |
|                             | N(5)-H(5N)...O(3)#5     | 2.22      | 2.997(9)  |
|                             | N(7)-H(7N)...O(6)#2     | 2.65      | 3.372(8)  |
|                             | N(7)-H(7N)...O(7)#2     | 1.93      | 2.672(9)  |
|                             | N(8)-H(8N)...N(2)#2     | 2.02      | 2.865(8)  |
|                             | N(9)-H(9N)...O(7)#2     | 2.60      | 3.163(10) |
|                             | N(9)-H(9N)...O(15)#3    | 2.11      | 2.842(9)  |
|                             | N(10)-H(10N)...O(5)#2   | 2.01      | 2.884(7)  |

Symmetry operation: #1 -x+1, y, -z+1; #2 x, y+1, z; #3 -x+1, y+1, -z+1; #4 -x+1, y-1, -z+1; #5 x, y-1, z  
#6 -x, y, -z; #7 -x+1/2, y-3/2, -z+1; #8 x-1/2, y-3/2, z-1; #9 x+1/2, y+3/2, z+1; #10 -x, y-1, -z  
#11 x-1/2, y-1/2, z; #12 -x+1/2, y+1/2, -z; #13 x+1/2, y+1/2, z; #14 x-1/2, y-1/2, z-1

**Table S11.** Hydrogen bond distances for **Pr(R)**.

| Name         | Hydrogen bond distances (Å) |          |           |
|--------------|-----------------------------|----------|-----------|
|              | D–H···A                     | d(H···A) | d(D···A)  |
| <b>Pr(R)</b> | O(11)-H(11A)...O(12)#5      | 1.94(4)  | 2.724(7)  |
|              | O(11)-H(11B)...O(15)#10     | 2.11(4)  | 2.894(6)  |
|              | O(12)-H(12)...O(13)#11      | 2.05(3)  | 2.818(6)  |
|              | O(13)-H(13A)...O(8)#4       | 2.17(2)  | 3.047(7)  |
|              | O(13)-H(13B)...O(2)#12      | 2.14(3)  | 2.921(6)  |
|              | O(14)-H(14A)...O(1)#13      | 2.15(9)  | 2.830(9)  |
|              | O(14)-H(14A)...N(5)#13      | 2.69(16) | 3.391(11) |
|              | O(14)-H(14B)...O(8)#4       | 2.33(3)  | 3.217(12) |
|              | O(15)-H(15A)...O(9)#14      | 2.10(5)  | 2.808(6)  |
|              | O(15)-H(15B)...O(3)         | 2.09(3)  | 2.916(6)  |
|              | N(3)-H(3N)...O(3)#5         | 2.01     | 2.825(6)  |
|              | N(3)-H(3N)...O(4)#5         | 2.46     | 3.226(5)  |
|              | N(4)-H(4N)...O(10)#5        | 2.28     | 3.152(5)  |
|              | N(5)-H(5N)...O(3)#5         | 2.21     | 2.994(6)  |
|              | N(7)-H(7N)...O(6)#3         | 2.65     | 3.364(5)  |
|              | N(7)-H(7N)...O(7)#3         | 1.93     | 2.669(6)  |
|              | N(8)-H(8N)...N(2)#3         | 2.01     | 2.857(5)  |
|              | N(9)-H(9N)...O(7)#3         | 2.60     | 3.161(6)  |
|              | N(9)-H(9N)...O(15)#2        | 2.08     | 2.817(6)  |
|              | N(10)-H(10N)...O(5)#3       | 2.01     | 2.885(5)  |

Symmetry operation: #1 -x+1, y, -z+1; #2 -x+1, y-1, -z+1; #3 x, y-1, z; #4 -x+1, y+1, -z+1; #5 x, y+1, z  
#6 -x, y, -z; #7 x-1/2, y+3/2, z-1; #8 -x+1/2, y+3/2, -z+1; #9 x+1/2, y-3/2, z+1; #10 -x, y+1, -z  
#11 x-1/2, y+1/2, z; #12 -x+1/2, y-1/2, -z; #13 x+1/2, y-1/2, z; #14 x-1/2, y+1/2, z-1

**Table S12.** Hydrogen bond distances for **Pr(S)**.

| Hydrogen bond distances (Å)                                                                              |                        |          |               |
|----------------------------------------------------------------------------------------------------------|------------------------|----------|---------------|
| Name                                                                                                     | D–H···A                | d(H···A) | d(D···A)      |
| <b>Pr(S)</b>                                                                                             | O(11)-H(11A)...O(12)#5 | 1.94(4)  | 2.724(7)      |
|                                                                                                          | O(11)-H(11B)...O(15)#5 | 2.11(4)  | 2.894(6)      |
|                                                                                                          | O(12)-H(12)...O(13)#10 | 2.05(3)  | 2.818(6)      |
|                                                                                                          | O(13)-H(13B)...O(2)#11 | 2.17(2)  | 3.047(7)      |
|                                                                                                          | O(13)-H(13A)...O(8)#4  | 2.14(3)  | 2.921(6)      |
|                                                                                                          | O(14)-H(14A)...O(1)#12 | 2.15(9)  | 2.830(9)      |
|                                                                                                          | O(14)-H(14A)...N(5)#12 | 2.69(16) | 3.391(11)     |
|                                                                                                          | O(14)-H(14B)...O(8)#4  | 2.33(3)  | 3.217(12)     |
|                                                                                                          | O(14)-H(14B)...N(6)#4  | 2.10(5)  | 2.808(6)      |
|                                                                                                          | O(15)-H(15A)...O(3)    | 2.09(3)  | 2.916(6)      |
|                                                                                                          | O(15)-H(15B)...O(9)#13 | 2.01     | 2.825(6)      |
|                                                                                                          | N(3)-H(3N)...O(3)#5    | 2.46     | 3.226(5)      |
|                                                                                                          | N(3)-H(3N)...O(4)#5    | 2.28     | 3.152(5)      |
|                                                                                                          | N(4)-H(4N)...O(10)#5   | 2.21     | 2.994(6)      |
|                                                                                                          | N(5)-H(5N)...O(3)#5    | 2.65     | 3.364(5)      |
|                                                                                                          | N(7)-H(7N)...O(6)#2    | 1.93     | 2.669(6)      |
|                                                                                                          | N(7)-H(7N)...O(7)#2    | 2.01     | 2.857(5)      |
|                                                                                                          | N(8)-H(8N)...N(2)#2    | 2.60     | 3.161(6)      |
|                                                                                                          | N(9)-H(9N)...O(7)#2    | 2.08     | 2.817(6)      |
|                                                                                                          | N(9)-H(9N)...O(15)#3   | 2.01     | 2.885(5)      |
| N(10)-H(10N)...O(5)#2                                                                                    | 2.02                   | 2.896(8) |               |
| Symmetry operation: #1 -x+1, y, -z+1; #2 x, y+1, z; #3 -x+1, y+1, -z+1; #4 -x+1, y-1, -z+1; #5 x, y-1, z |                        |          | #6 -x, y, -z; |
| #7 -x+1/2, y-3/2, -z+1; #8 x-1/2, y-3/2, z-1; #9 x+1/2, y+3/2, z+1; #10 x-1/2, y-1/2, z                  |                        |          |               |
| #11 -x+1/2, y+1/2, -z; #12 x+1/2, y+1/2, z; #13 x-1/2, y-1/2, z-1                                        |                        |          |               |

**Table S13.** Bond-valence sum (BVS) calculations for **Ln(R)** and **Ln(S)** (Ln = La, Ce, and Pr).

|        | La(R) | La(S) | Ce(R) | Ce(S) | Pr(R) | Pr(S) |
|--------|-------|-------|-------|-------|-------|-------|
| Ln (1) | 3.40  | 3.39  | 3.48  | 3.38  | 3.46  | 3.46  |
| Ln (2) | 3.13  | 3.15  | 3.19  | 3.15  | 3.20  | 3.14  |

**Table S14.** SHG efficiencies of Ln-CPs composed of lanthanide cations and chiral organic ligands.

| Name                                                                                                                                                                                 | Space group | Chiral template                                                                                                | SHG efficiency                 |
|--------------------------------------------------------------------------------------------------------------------------------------------------------------------------------------|-------------|----------------------------------------------------------------------------------------------------------------|--------------------------------|
| $\text{Ln}_2((S,S)\text{-TBA})_2((S,S)\text{-HTBA})_2(\text{H}_2\text{O})_2 \cdot 7\text{H}_2\text{O}$<br>[Ln = La, Ce, and Pr]                                                      | $C_2$       | 1,3,5-triazin-2(1 <i>H</i> )-one-4,6-bis(alanyl)                                                               | $8 \times \alpha\text{-SiO}_2$ |
| $\{[\text{Ln}_2(\text{HL})_2(\text{NO}_3)_4(\text{H}_2\text{O})_4] \cdot \text{NO}_3 \cdot \text{Cl} \cdot 7\text{H}_2\text{O}\}_n$ <sup>[11]</sup><br>[Ln = Nd, Pr, Sm, Eu, and Tb] | $P2_1$      | ( <i>S</i> )-2-((4-([2,2':6',2''-terpyridin]-4'-yl)benzyl)amino)propanoic acid                                 | $0.28 \times \text{KDP}$       |
| $[\text{Ce}_2((R \text{ or } S)\text{-CIA})_2(\text{H}_2\text{O})_5] \cdot 2\text{H}_2\text{O}$ <sup>[2]</sup>                                                                       | $P1$        | ( <i>R</i> or <i>S</i> )-5-(1-carboxyethoxy) isophthalic acid                                                  | $0.4 \times \text{urea}$       |
| $[\text{Ce}(\text{L or D-tart})(\text{CH}_2\text{OHCH}_2\text{OH})(\text{H}_2\text{O})]\text{Cl}$ <sup>[3]</sup>                                                                     | $P2_1$      | L or D-tartaric acid                                                                                           | $0.5 \times \text{urea}$       |
| $\{[\text{Gd}_4(\text{R-ttpe})_2(\text{R-Httpe})_2(\text{HCOO})_2(\text{H}_2\text{O})_8] \cdot 4\text{H}_2\text{O}\}_n$ <sup>[4]</sup>                                               | $P2_1$      | (3 <i>R</i> ,3' <i>R</i> ,3'' <i>R</i> )-1,1',1''-(1,3,5-triazine-2,4,6-triyl)-tripiperidine-3-carboxylic acid | $0.5 \times \text{urea}$       |
| $[\text{Ln}_2(\text{cpfa})_3]_n$ <sup>[5]</sup><br>[Ln = Yb and Lu]                                                                                                                  | $P2_12_1$   | ( <i>R</i> )-4-(4-(1-carboxyethoxy)phenoxy)-3-fluorobenzoic acid                                               | $0.5 \times \text{urea}$       |

## Reference

1. Dong, Y.-L.; Sun, H.-Z.; Teng, B.-S.; Ma, Y.-J.; Wang, X.; Wu, B.-L., Homochiral lanthanide metal–organic frameworks based on amino acid-functionalized terpyridyl ligand: synthesis, structure determination, and optical properties. *Inorg. Chim. Acta* 2020, **513**, 119931.
2. Sun, L.; Hou, G.-F.; Jiang, W.-H.; Huang, Q.; Yu, Y.-H.; Gao, J.-S., A pair of Ce(III) coordination polymers based on chiral semi-rigid T-shaped tricarboxylate enantiomeric ligands: Synthesis, crystal structure and properties. *Polyhedron* 2017, **129**, 55-59.
3. Hu, G.; Zhang, H.; Miao, H.; Wang, J.; Xu, Y., Synthesis, structures and properties of two new chiral rare earth-organic frameworks constructed by l/d-tartaric acid. *J. Solid State Chem.* 2015, **229**, 208-212.
4. Liang, X.; Zhang, F.; Zhao, H.; Ye, W.; Long, L.; Zhu, G., A proton-conducting lanthanide metal–organic framework integrated with a dielectric anomaly and second-order nonlinear optical effect. *Chem. Commun.* 2014, **50**, 6513-6516.
5. Gao, C.-H.; Zhang, L.; Hou, G.-F.; Ma, D.-S.; Jiang, W.-H.; Yu, Y.-H., Syntheses, structures and properties of chiral Ln(III) coordination polymers based on (*R*)-4-(4-(1-carboxyethoxy)phenoxy)-3-fluorobenzoic acid. *Inorg. Chem. Commun.* 2017, **78**, 70-73.
